# 1 Translational Activity Controls Ribophagic Flux and Turnover of 2 Distinct Ribosome Pools

3 Jakob Trendel<sup>1,2</sup>, Milan Aleksić<sup>3</sup>, Matilde Bertolini<sup>2,3,4</sup>, Marco Jochem<sup>2</sup>, Günter  
4 Kramer<sup>2,3,4</sup>, Stefan Pfeffer<sup>3</sup>, Bernd Bukau<sup>2,3,4</sup>, Jeroen Krijgsveld<sup>2,5,\*</sup>

5 <sup>1</sup> European Molecular Biology Laboratory (EMBL), Heidelberg, Germany.

6 <sup>2</sup> German Cancer Research Center (DKFZ), Heidelberg, Germany.

7 <sup>3</sup> Center for Molecular Biology of Heidelberg University (ZMBH), Heidelberg, Germany.

8 <sup>4</sup> DKFZ-ZMBH Alliance, Heidelberg, Germany.

9 <sup>5</sup> Heidelberg University, Medical Faculty, Heidelberg, Germany.

10 \*Correspondence to: Jeroen Krijgsveld, German Cancer Research Center (DKFZ), Im Neuenheimer  
11 Feld 581, 69120 Heidelberg, Germany, j.krijgsveld@dkfz.de, +49-6221-421720.

12

## 13 Summary

14

15 Ribosomes are among the most abundant and complex machineries in the cell, however, the turnover  
16 of their subunits remains poorly understood. Here, we apply proteomic flux and cryo-electron  
17 microscopy analyses to interrogate the ribosome life cycle in human cells. We show that subpopulations  
18 of ribosomal subunits coexist, which vary in turnover kinetics and structure. Specifically, 80S ribosomes  
19 have a much longer half-life than free 40S and 60S ribosomal subunits, indicating that they represent  
20 distinct subunit pools that poorly intermix. Translation inhibition starkly increases the pool-size of 80S  
21 ribosomes in a translationally idle state and induces ribophagy of old ribosomes, ultimately rejuvenating  
22 the ribosome fleet. Our findings provide a comprehensive model for ribosome turnover and its regulation  
23 via translational activity.

24

## 25 Introduction

26

27 Cells continuously turn over their proteome through protein biosynthesis and decay, where ribosomes  
28 constitute the core machinery translating messenger RNA (mRNA) into nascent proteins, while the  
29 ubiquitin-proteasome and the autophagy-lysosome system are the main pathways for protein  
30 degradation <sup>1</sup>. Ribosomes are highly abundant, representing six percent of the protein mass in  
31 mammalian cells, and more than 80 percent of the total RNA <sup>2</sup>. Throughout their lifetime eukaryotic  
32 ribosomal proteins can be part of multiple assembly states. A large excess of free ribosomal protein is  
33 continuously produced in the cytosol and shuttled into the nucleus, only a fraction of which is  
34 incorporated into nascent ribosomal subunits, whereas the majority is quickly degraded by the  
35 proteasome <sup>3-6</sup>. Fully assembled small (40S) and large (60S) ribosomal subunits undergo final  
36 maturation in the cytosol <sup>7</sup> before they combine into a translation-competent 80S complex at the start  
37 codon of mRNA during translation initiation <sup>8</sup>. To release the ribosome from mRNA upon arrival at the  
38 stop codon, the 80S complex must be split into small and large subunits which then join the pool of free  
39 subunits <sup>9</sup>, although immediate re-joining of subunits can occur on the same transcripts in another round  
40 of initiation in a process called ribosome recycling <sup>10,11</sup>. Additionally, a significant proportion of subunits  
41 is kept in translationally inactive 80S complexes (also known as idle, empty or hibernating ribosomes),  
42 whose origins, fate and function remain elusive. The proportion of idle 80S ribosomes strongly increases  
43 upon serum withdrawal, which has been utilized for the preparation of pure 80S populations for structural  
44 studies <sup>12,13</sup>. Degradation of ribosomal complexes, especially under nutrient-poor conditions, is mediated  
45 by ribophagy, a selective form of autophagy <sup>14-17</sup>. Ribophagy receptors such as the human NUFIP1  
46 selectively recruit ribosomes to autophagosomes <sup>18</sup> replenishing the cellular nucleotide and amino acids  
47 pools in times of starvation <sup>19</sup>. In addition, we recently reported a rapid form of ribophagy during stress-  
48 induced translational arrest, which eliminates up to 50 % of ribosomal protein within 30 minutes <sup>20</sup>. This

49 fast form of ribophagy only minutes after stress is markedly different to long term degradation events  
50 that happen over the course of several hours to days during nutrient withdrawal.<sup>15,17</sup>  
51 Despite detailed insight in ribosome biogenesis and function<sup>7-9</sup>, fundamental questions remain towards  
52 how ribosome homeostasis is maintained, and how turnover of a ribosomal protein differs before and  
53 after becoming part of a ribosomal complex. In addition, it is unknown if ribosome biogenesis and  
54 ribophagy are independent or functionally coupled processes, and if translational activity influences  
55 these turnover kinetics. To address these questions and determine how protein flux is regulated in  
56 ribosomal complexes, we applied two orthogonal pulsed-SILAC proteomic approaches that revealed the  
57 lifecycle of ribosomal subunits along different assembly states in human MCF7 cells. Using cryo-electron  
58 microscopy (EM), we show that virtually all ribosomes outside the polysome fraction are translationally  
59 inactive. Furthermore, we demonstrate that different forms of translational arrest strongly increase the  
60 pool of idle 80S ribosomes, triggering ribophagy. Collectively, our findings demonstrate that ribosome  
61 homeostasis is intimately linked to translational activity.

62

## 63 Results

64

### 65 A Highly Robust Normalization Procedure for Protein Half-Life Measurements within Purified 66 Ribosomal Complexes

67 In turnover measurements of the total proteome all possible assembly states of a ribosomal protein are  
68 averaged into one protein half-life, so that information about the turnover within each state is lost. In  
69 order to compare the half-lives of ribosomal proteins in different ribosomal complexes we purified them  
70 individually from MCF7 cells with polysome profiling. Therefore, we first verified that this could be  
71 performed reproducibly and quantified proteins within the individual fractions using intensity-based,  
72 label-free proteomics (Fig. S1A). Indeed, we found good precision of our MS analysis between biological  
73 replicates (Fig. S1B, Table S1) and reproduced the stoichiometric range of ribosomal proteins  
74 anticipated from earlier work<sup>21</sup>. To derive protein half-lives within ribosomal complexes, we combined  
75 polysome profiling with a time course of pulsed-stable-isotope-labelling in cell culture (pulsed-SILAC)  
76 multiplexed with tandem-mass-tag labelling (TMT) (Fig. 1A). This labelling strategy was initially  
77 presented as iTRAQ-4Plex-SILAC<sup>22</sup>, first implemented in human cells as TMT-10Plex-SILAC<sup>23</sup> and  
78 recently revisited by Zecha et al., who greatly improved the analysis of TMT-SILAC data using a single  
79 search in MaxQuant<sup>24</sup>. To minimize experimental variability, we adapted the TMT-SILAC approach by  
80 Zecha et al. by changing the SILAC labelling scheme to allow for the processing of identical amounts of  
81 cells from all time points in one common ultracentrifugation run for polysome profiling. Therefore, SILAC  
82 heavy-labelled MCF7 cells were switched to SILAC light media at nine time points between 32 to 2  
83 hours before the simultaneous cell harvest (Fig. 1A). Indeed, this resulted in a reproducible fractionation  
84 of ribosomal complexes for all time points, albeit with remaining variability of the amounts contained  
85 within each fraction (Fig. 1B). Subsequent MS quantification of their protein constituents showed strong  
86 discontinuity between time points, impeding meaningful derivation of ribosomal protein half-lives from  
87 their decay curves (illustrated for 80S ribosomes in Fig. 1C, left). Using a similar experimental setup to  
88 derive protein half-lives for the total proteome of MCF7 cells we observed much better data continuity  
89 (Fig. S1D), indicating that the extensive sample processing required for the purification of ribosomal  
90 complexes had introduced strong variation to our MS measurements that could not be avoided despite  
91 our efforts to process equal amounts of all samples in one batch. Conceptually, the decay model applied  
92 here to derive protein half-lives requires that protein amounts stay constant across time points. Previous  
93 studies approached this by normalizing the combined TMT reporter intensities of each time point to one  
94 common total sum that is identical for all TMT channels (total sum normalization, TSN)<sup>23,24</sup>, introducing  
95 the assumption that the total amount of protein is constant across time points if the combined TMT  
96 reporter intensity is constant across TMT channels. Applying this normalization to our data (Fig. 1C left,  
97 Fig. S1D, H) or published data from Zecha et al. (Fig. S2A) we noticed that for individual peptides the  
98 resulting sum of TMT reporter intensities between the light and heavy SILAC channel was often very

99 inconsistent between time points. For peptides of the same protein this inconsistency prevailed even  
100 within one time point and, additionally, differed between replicates (Fig. 1D, top).

101

102 In order to improve the continuity between time points and comply with the prerequisite of the decay  
103 model that combined protein amounts must stay constant over time, we introduced peptide sum  
104 normalization (PSN), which, for each peptide, normalizes the combined TMT reporter intensities from  
105 both SILAC channels to be equal across time points (Fig. 1D, bottom). Applying PSN to TMT-SILAC  
106 data of the MCF7 total proteome demonstrated that it was highly beneficial for data continuity, leading  
107 to a much larger number of curves that could be used for model fitting with much better fits (Fig. S1E).  
108 Consequently, the number of half-lives derived for both protein synthesis and decay in the total proteome  
109 of MCF7 cells more than doubled from 921 under TSN (Fig. S1D) to 2402 under PSN (Fig. S1E, Table  
110 S2). We validated PSN on published protein decay data from HeLa cells<sup>24</sup> where we were able to derive  
111 decay as well as synthesis half-lives for 4932 proteins, compared to 3882 proteins using TSN (Fig. S1G,  
112 Fig. S2A-E, see Materials and Methods). Moreover, synthesis and decay half-lives were virtually  
113 identical under PSN (Pearson  $R^2=1$ ), both in our own (Fig S1E) and published data (Fig. S1G) indicating  
114 that our new normalization had effectively implemented the necessary prerequisite of the protein decay  
115 model that required protein amounts to stay constant over time. This is not a trivial result, since during  
116 a TMT-SILAC run protein synthesis is measured independently from protein decay when the mass  
117 spectrometer picks a SILAC heavy or light precursor ion to quantify the entire timeline on the MS3 level  
118 with TMT reporter ions (Fig. 1A). Interestingly, HeLa protein synthesis half-lives from PSN-corrected  
119 data were similar to protein synthesis half-lives from TSN corrected data ( $R^2=0.86$ ), and so were protein  
120 decay half-lives ( $R^2=0.81$ ), whereas within TSN protein decay and synthesis half-lives were rather  
121 dissimilar ( $R^2=0.42$ ) (Fig. S1G). We tested if PSN could also be applied to different biological replicates  
122 and found that cross-replicate normalization (Fig. S1F) performed even slightly better than within-  
123 replicate normalization (Fig. S1E), returning 7 % more protein half-lives for the MCF7 total proteome. In  
124 addition, we benchmarked PSN by swapping correction factors across time points, consistently  
125 obtaining inferior correlation between synthesis and decay, indicating the specificity of PSN (Fig. S2F).

126

127 Having established PSN, we applied it to the TMT-SILAC data of the polysome profiling fractions,  
128 allowing us to derive hundreds of protein half-lives (1454 from 40S fraction, 1282 from 60S fraction, 549  
129 from 80S fraction, 685 from polysome fraction, Table S2), including most ribosomal proteins (50 from  
130 40S fraction, 79 from 60S fraction, 71 from 80S fraction, 66 from polysome fraction). The decisive  
131 improvement effectuated by PSN now made protein half-life measurements in ribosomes possible, as  
132 demonstrated for the 80S fraction in Fig. 1C and Fig. S1H&I. In summary, we introduce PSN as a new  
133 normalization regimen that significantly improved our own and published half-life measurements of the  
134 total proteome, and allowed us to determine protein half-lives within purified ribosomal complexes.

135

### 136 **Protein Half-Lives in Polysome Profiling Fractions Reveal Distinct Pools of Ribosomal Subunits**

137 Using PSN we could now compare protein half-lives between the different ribosomal complexes we had  
138 purified using polysome profiling (Fig. 1B), as well as protein half-lives in the total proteome of MCF7  
139 cells. Fig. 1E shows that half-lives of ribosomal proteins were similar in the total proteome and in free  
140 40S and 60S subunits, yet, were strongly stabilized when assembled in 80S complexes of the 80S and  
141 polysome fractions. On average ribosomal proteins of the small subunit had 3-fold longer half-lives within  
142 the 80S fraction compared to the 40S fraction ( $p=5.2E-8$ , Wilcoxon ranksum test), whereas large subunit  
143 proteins had 4.6-fold longer half-lives within the 60S fraction compared to the 80S fraction ( $p=1.0E-10$ ).  
144 For the polysome fraction the stabilization was slightly weaker, where small and large subunit proteins  
145 were stabilized 1.9-fold ( $p=1.2E-5$ ) and 3.1-fold ( $p=1.6E-14$ ), respectively. Notably, small subunit  
146 proteins of the 40S fraction were significantly more stable than large subunit proteins of the 60S fraction,  
147 explaining the different degrees of their stabilization towards 80S complexes. These observations have  
148 three important implications. First, they suggest that free 40S and 60S subunits on the one hand, and  
149 80S ribosomes and polysomes on the other hand, exist as separate pools that poorly mix: If free

150 exchange of subunits existed between the 40S/60S and 80S/polysome fractions, there would eventually  
151 be no difference in the half-lives of the ribosomal proteins they contain. Second, since free ribosomal  
152 subunits were overall much younger than 80S assemblies, and since ribosome biogenesis is known to  
153 produce free 40S and 60S subunits and not 80S assemblies<sup>7</sup>, this indicates successive aging states  
154 along the ribosome life cycle: free 40S and 60S subunits were the youngest, followed by polysomes and  
155 finally ribosomes in the 80S fraction. Thus, free small and large subunits have two ways of disappearing  
156 from their pool, i.e. being degraded or becoming an 80S complex in the polysome or 80S fraction. Third,  
157 by comparing our label-free quantification between MCF7 polysome profiling fractions we estimated that  
158 free 40S subunits were twice as abundant as 60S subunits (Fig. S1C, Table S1). The lower abundance  
159 and more rapid turnover of 60S subunits suggested that they represented the limiting factor in the  
160 formation of new 80S ribosomes (Fig. 1E).

161 In summary, the half-lives of ribosomal proteins within purified ribosomal complexes revealed different  
162 aging stages in the lifetime of ribosomal subunits, and pointed to 80S complexes as a distinct pool  
163 characterized by strongly increased stability.

164

### 165 **The Monosome Fraction Predominantly Contains Inactive 80S Ribosomes with a Destabilized P- 166 Stalk Base**

167 Since ribosomes in the 80S fraction exhibited particular stability we investigated if this could be  
168 associated with their translational activity or specific structural characteristics. We compared polysome  
169 profiles of MCF7 cells at high and low salt, and observed that the vast majority of ribosomes in the 80S  
170 peak dissociated into 40S and 60S subunits (Fig. 2A), indicating that they were not attached to mRNA  
171<sup>25,26</sup> and were thus translationally idle. To corroborate this, we characterized ribosomes in the pooled  
172 non-polysomal fractions by cryo-electron microscopy (cryo-EM) single particle analysis (Fig. S3&4),  
173 obtaining a cryo-EM structure of the 80S ribosome at 3.28 Å resolution (Fig. 2B). Analysis of the cryo-  
174 EM density confirmed that the 80S ribosomes were translationally inactive, as demonstrated by the  
175 complete absence of cryo-EM density for molecular markers of active translation, i.e. mRNA in the  
176 ribosomal mRNA channel, a nascent chain in the ribosomal peptide exit tunnel, tRNAs in the ribosomal  
177 A-, P- and E-sites (Fig. 2B) or translation elongation factors. Moreover, a significant fraction of ribosomes  
178 bore ribosomal ligands typically associated with translational inactivity: In a subpopulation of 80S  
179 ribosomes (13.25%) resolved to 5.64 Å global resolution (Fig. S5A, Fig. S3, Fig. S4C) the decoding  
180 center was found to be obstructed with the protein LYAR<sup>27</sup>, which was consistent with the high  
181 abundance of LYAR detected in the 80S fraction by MS (Table S1). Another subpopulation of 80S  
182 ribosomes (16.89%) resolved to 4.34 Å global resolution (Fig. S5B, Fig. S3, Fig. S4E) showed P- and  
183 E-sites were occupied by the protein IFRD2<sup>28</sup>. These combined results demonstrate that ribosomes in  
184 the monosome fraction mostly contained idle 80S complexes that were therefore functionally distinct to  
185 80S complexes of the polysome fraction.

186

187 Interestingly, detailed inspection of the 80S cryo-EM reconstruction indicated increased plasticity of  
188 ribosomal proteins for the ribosomal P-stalk area (RPL12, RPL40, RPLP0, RPLP1 and RPLP2, Fig. 2C),  
189 as compared to canonical translating ribosomes (Fig. 2D&E)<sup>29</sup>. The ribosomal P-stalk base provides  
190 crucial interfaces for binding of translational GTPases and release factors, but also ribosome splitting  
191 and recycling factors such as eRF1 and ABCE1 displayed in Fig. 2F<sup>30</sup>. Higher plasticity of the P-stalk  
192 base area may therefore provide a structure-based rationale for the stability of inactive 80S ribosomes  
193 by impeding the binding of ribosome splitting factors. Notably, a similar set of ribosomal proteins was  
194 previously observed to be specifically ubiquitinated and, thus, destabilized in a similar manner in yeast  
195 upon oxidative stress-induced translational halt<sup>31</sup>, suggesting an evolutionary conserved role for stalk  
196 plasticity in the regulation of translational activity. In conclusion, our polysome profiling and cryo-EM  
197 analysis showed that the vast majority of ribosomes in the 80S fraction were translationally inactive and  
198 did not reside on mRNA, clearly distinguishing them from translationally active, mRNA-bound  
199 polysomes.

200



## 201 **Inhibition of Translation Produces Inactive 80S Ribosomes and not Free Subunits**

202 Having observed that ribosomes in the 80S fraction were particularly stable and translationally inactive  
203 we aimed to clarify their origin. To investigate if they were derived from previously translating 80S  
204 complexes we induced translational arrest with arsenite in MCF7 cells and observed a collapsed  
205 polysome fraction and a simultaneous buildup of inactive 80S ribosomes (Fig. 3A). Arsenite is known to  
206 inhibit translation initiation via phosphorylation of EIF-2 $\alpha$ , thereby preventing loading of the initiator  
207 methionine-tRNA complex<sup>32</sup>. Interestingly, other translation inhibitors with different modes of action,  
208 such as harringtonine (stalling translation initiation without interfering with translation elongation or  
209 termination<sup>33-35</sup>) and puromycin (inducing premature termination by peptide chain termination<sup>36</sup>) also  
210 led to a strong accumulation of inactive 80S ribosomes, mirroring earlier, published observations using  
211 human or mouse cells<sup>37,38</sup>. We found that arsenite stress led to a complete collapse of the polysome  
212 fraction as soon as ten minutes into the treatment (Fig. S6A), and we used the non-polysomal fractions  
213 from this time point for structural characterization by cryo-EM analysis. This confirmed that these 80S  
214 ribosomes were translationally inactive and virtually identical to the 80S ribosome without arsenite  
215 treatment in terms of overall structure and composition (Fig. S6B, see also Materials and Methods).  
216 Consistently, compared to the 80S ribosomes without arsenite treatment, densities for ribosome  
217 inactivation factors LYAR and IFRD2 were detected at similar stoichiometries (15.52% and 13.02%,  
218 respectively, Fig. S5C&D). The high similarity of idle 80S ribosomes observed under unperturbed  
219 conditions and after arsenite treatment indicated that inactive 80S ribosomes in general were derived  
220 from previously translating 80S ribosomes.

221

## 222 **An Increased Pool of Inactive 80S Ribosomes Accelerates the Ribophagic Flux**

223 Recently, we reported that arsenite induces a very fast and drastic form of ribophagy in human cells,  
224 eliminating up to 50% of cytosolic ribosomal proteins within 30 minutes<sup>20</sup>. Since our polysome profiling  
225 experiments indicated that translational arrest caused by arsenite, harringtonine and puromycin similarly  
226 increased the pool size of idle 80S ribosomes (Fig. 3A), this raised the question if they also triggered  
227 the selective elimination of ribosomes. Indeed, SILAC-based quantification of the MCF7 total proteome  
228 revealed that all three translation inhibitors induced similar degradation of the same proteins within 30  
229 minutes of treatment (Fig. 3B&C, Table S3). These proteins were highly enriched for gene ontology  
230 terms related to the cytosolic ribosome and translation, ( $p < 10E-30$  for all three substances, ranked GO  
231 enrichment, Fig. 3D), strongly indicative of ribophagy. Thus, our data suggested that translational arrest,  
232 irrespective of the agent and its mechanism of action, produced inactive 80S ribosomes, consequently  
233 increasing the ribophagic flux. Especially the mechanism of puromycin – leading to unnatural peptide  
234 chain termination without natural translation termination<sup>36</sup> – prompted us to conclude that the increased  
235 availability of inactive 80S complexes and not translation termination triggered increased ribophagy. By  
236 this model, the magnitude of the ribophagic flux should be proportional to the strength of translational  
237 inhibition. To test this, we challenged MCF7 cells with six increasing concentrations of arsenite and  
238 again used SILAC to quantify protein abundances in their total proteome in comparison to untreated  
239 cells (Fig. 4A). This revealed a clear dose-response relationship in the ability of arsenite to induce  
240 degradation of ribosomal proteins, which was readily reproducible in HeLa cells (Figure S7A).  
241 Collectively, we show that the availability of inactive 80S ribosomes and their degradation is a function  
242 of translational activity, thereby forming a regulatory connection between protein synthesis and decay.

243

## 244 **Translational Arrest Induces Ribophagic Degradation of Old Ribosomes**

245 Since the ribophagic machinery is assumed to target ribosomes in the 80S assembly state<sup>18</sup>, and since  
246 we had observed that inactive 80S ribosomes were on average much older than other ribosomal  
247 assemblies (Fig. 1E), we hypothesized that ribophagy preferentially eliminated old ribosomes. To test  
248 this experimentally, we monitored the arsenite-induced degradation of proteins with increasing age.  
249 Therefore, we applied azido-homoalanine (AHA) to mark proteomes of different ages (5 hours AHA-  
250 labelling pulse followed by 0-25 hours of chase), which were then enriched by click-chemistry for  
251 analysis by MS (Fig. 4B). In order to compare protein abundances in the differently aged proteomes of

252 arsenite and untreated cells, this was again combined with SILAC labelling<sup>39,40</sup>. Indeed, the effect of  
253 arsenite on ribosome degradation was strongly dependent on protein age: while young ribosomal  
254 proteins (no chase) were nearly untouched by arsenite-induced ribophagy, older ribosomal proteins  
255 were progressively degraded with increasing age (Fig. 4C). Direct comparison of a young (no chase) to  
256 an old (25 hours chase) proteome over the course of 30 minutes of arsenite treatment emphasized this  
257 effect (Fig. 4D). Ribophagy reportedly leads to significant bystander flux, eliminating non-ribosomal,  
258 translation-associated proteins, while ingesting ribosomes into autophagic vesicles<sup>15,20,41</sup>. We also  
259 observed bystander flux, however without protein age-dependence (Fig. S7B), indicating that arsenite-  
260 induced ribophagy specifically eliminated old ribosomes and not old protein in general.  
261 These data demonstrate that arsenite-induced ribophagy accelerates the targeted degradation of 80S  
262 ribosomes, thereby eliminating old ribosomal protein, ultimately rejuvenating the ribosomal proteome.  
263

### 264 **Constrained Conformational Plasticity of Inactive 80S Ribosomes Upon Translational Halt**

265 In search for a degradation signal on 80S ribosomes we analyzed our differentially treated total  
266 proteomes (Fig. 3C) as well as our pulsed-SILAC-AHA timelines (Fig. 4C&D) for arsenite-induced  
267 protein modifications using the mass-tolerant search engine MSfragger<sup>42</sup>. However, we neither found  
268 appreciable degrees of known modifications (ubiquitination, phosphorylation, acetylation) nor  
269 accumulations of unknown mass adducts (data not shown). In order to understand if there were any  
270 other molecular features that cued the degradation of 80S ribosomes upon translational arrest, we  
271 revisited our cryo-EM data. Since the overall structures of the inactive 80S ribosomes were very similar  
272 in untreated cells and in cells exposed to arsenite for 10 minutes (Fig. 2, Fig. S6) we explored whether  
273 their structural plasticity differed, especially with respect to the large-scale, inter-subunit rearrangements  
274 that ribosomes undergo during each cycle of translation elongation<sup>29</sup>. By sorting the 80S complexes  
275 according to their 40S-60S rotation we observed that untreated 80S ribosomes exhibited heterogeneous  
276 80S conformational states, with the post-translocation (POST)-like state constituting the most abundant  
277 class occurring in 38.16 % of cases (Fig. S7C&D). In contrast, after arsenite exposure inactive  
278 ribosomes were conformationally highly homogenous, adopting the POST-like conformational state in  
279 90.55 % of cases (Fig. S7E&F). This indicated that a thus far unknown mechanism limited the  
280 conformational plasticity of 80S ribosomes upon arsenite-induced translational arrest where ribosomes  
281 mostly maintained the energetically stable POST-like configuration<sup>43</sup>.

282 Overall, our structural analysis suggests that the ribophagic flux might not only be controlled by the  
283 concentration of inactive 80S ribosomes but also by their conformational state.  
284

## 285 **Discussion**

### 286 **Per-Peptide Normalization Allows for Protein Turnover Studies in Purified Protein Complexes**

287 Determination of protein half-lives in cells that grow and divide has been a long-standing problem,  
288 revolving around the conundrum that data generated from systems in disequilibrium do not formally  
289 qualify to be fit to a model that requires a steady state, as it is the case for the first-order decay model  
290 commonly used to describe protein decay<sup>23,24,44,45</sup>. In order to still approximate protein turnover,  
291 previous studies fitted data from dividing cells to the model, frequently applying a *post hoc* correction  
292 factor for cell division<sup>23,24,44</sup>. Here we introduced PSN to take an alternative approach by first applying  
293 a per-peptide normalization, strongly enhancing the fitting process by improving continuity of the data  
294 and transforming it into the equilibrium state required by the model. This is conceptually different to  
295 previous studies that neglected the equilibrium requirement before fitting. Consequently, PSN allowed  
296 us to derive turnover kinetics for ribosomal proteins in four states (free protein, part of free 40S/60S  
297 subunit, idle 80S ribosome, or actively translating 80S ribosome), demonstrating that the half-life of the  
298 same protein can differ depending on the complex it participates in. Our findings confirm previous work  
299 that found many half-lives in the total proteome are better explained by a two-state model for protein  
300 decay<sup>45</sup>, which in the case of ribosomal proteins we can in fact extend to a superposition of at least four  
301 distinct decay processes. We note here that data normalized with PSN can of course be fitted to higher-  
302

303 order models, which will undoubtedly benefit from the improved data continuity just as much. PSN  
304 rationalizes protein half-life measurements in dividing cells accepting that absolute half-lives will be  
305 slightly skewed to the benefit of much improved fitting, which we argue is better than skewing half-lives  
306 by fitting non-steady-state protein decay curves to a steady-state model. Thereby, PSN yields the  
307 distinctive power to compare protein half-lives between conditions or within different cellular  
308 preparations, as evidenced by our analysis of half-lives within polysome profiling fractions. We envision  
309 future applications of PSN in studying the proteome dynamics within other complexes (e.g. using  
310 immunoprecipitation, size exclusion chromatography etc.), in organelles, or in other non-steady-state  
311 scenarios (e.g. drug treatments, development, infection etc.).

### 312 **Distinct Pools of Ribosomal Subunits Organize the Ribosome Life cycle**

313 In the canonical view on translation in eukaryotes, 80S splitting is seen as the last step in the termination  
314 process, releasing free subunits from the mRNA into the cytosol <sup>9</sup>. Several of our observations  
315 challenged this model, instead indicating that 80S complexes reunite into stable, inactive 80S  
316 complexes after translation termination (Fig. 5): First, inhibition of translation with various drugs  
317 consistently led to the accumulation of idle 80S ribosomes (Fig. 3A). Second, these inactive 80S  
318 ribosomes were structurally identical to inactive 80S ribosomes from untreated cells (Fig. 2B & Fig.  
319 S6B). Third, protein half-lives showed that ribosomal proteins were strongly stabilized in the 80S or  
320 polysome fraction, while this was not the case in the 40S or 60S fraction (Fig. 1E), suggesting the  
321 existence of distinct subunit pools that did not intermix. Importantly, all three observations are in direct  
322 agreement, where the formation of inactive 80S complexes after translation provides a mechanism to  
323 avoid mixing with nascent, free 40S and 60S subunits. Based on these observations we propose that  
324 inactive 80S complexes are a normal transient state arising from translating ribosomes that have  
325 finished one round of translation, potentially awaiting to engage in a new round (Fig. 5). Indeed, it has  
326 been shown that recycling of 80S complexes can be linked to translation initiation via ABCE1 – a central  
327 component of the ribosome splitting apparatus.<sup>46</sup> Moreover, a mechanistic study on translation initiation  
328 from idle 80S ribosomes found in an *in vitro* translation system with human components that formation  
329 of the 48S initiation complex occurred equally well from inactive 80S assemblies or free 40S subunits in  
330 the presence of the human splitting apparatus (PELO-HBS1L-ABCE1)<sup>47</sup>. Additionally, in yeast it was  
331 reported that upon nutrient withdrawal inactive 80S ribosomes accumulate and require the yeast  
332 ribosome splitting apparatus (Dom34-Hbs1) to resume translation when nutrients are replenished <sup>48</sup>.  
333 This indicates that inactive 80S ribosomes are stable yet biologically accessible entities. Our cryo-EM  
334 analysis suggested that inactive ribosomes within the 80S fraction might be splitting-incompetent  
335 because of the elevated plasticity in their binding sites for ribosome splitting and recycling factors (Fig.  
336 2C-F). In order to regain the ability to split and engage in translation initiation (Fig. 5) idle 80S complexes  
337 would therefore require reconstitution of the p-stalk, offering a regulatory mechanism by which inactive  
338 80S ribosomes might become reactivated towards the pool of actively translating ribosomes. Indeed, in  
339 yeast it has been shown that the flexible ribosomal stalk plays an important role in translation regulation  
340 <sup>49</sup> and that after translational arrest inactive 80S ribosomes return to normal function <sup>48</sup>.  
341

342 An open question is how subunits reunite after being released from the mRNA. This could occur  
343 spontaneously because the 40S and 60S subunits have high affinity towards each other and are in close  
344 proximity after splitting with very limited diffusion rates due to the high degree of molecular crowding in  
345 the cytoplasm <sup>50</sup>. In fact, it is known that eIF6 binds to nascent 60S subunits to prevent their spontaneous  
346 joining with 40S subunits <sup>51</sup>. In accordance with this, we found eIF6 at a 1:1 ratio relative to large subunit  
347 proteins in the 60S fraction (Table S1) and our cryo-EM analysis similarly indicated that eIF6 was  
348 present on 30 % of the identified 60S subunits (Fig. S8, Fig. S3, Fig. S4K). In contrast, all other fractions  
349 contained eIF6 only at a ratio of around 1:100 (Table S1). This implies that the free 60S complexes bear  
350 eIF6 and are therefore nascent <sup>51</sup>, whereas mature 60S subunits in idle or translating 80S complexes  
351 do not bear EIF6 and therefore spontaneously rejoin into 80S complexes after splitting. Notably, this is  
352 in line with our half-life measurements where we observed free 60S subunits to be very young (Fig. 1E).  
353 Considering that translating 80S complexes are often in the proximity of other 80S complexes on the

354 same mRNA or on the surface of the endoplasmic reticulum, re-joining could also occur between distinct  
355 80S complexes thereby exchanging subunit partners. Another, yet, less-documented possibility is that  
356 inactive 80S ribosomes arise by a drop-off mechanism, releasing intact 80S complexes from mRNA  
357 during premature termination.<sup>52</sup>

358

359 Conceptually, a pool of 80S ribosomes distinct from free subunits comes with a number of advantages.  
360 First, functional 80S ribosomes are kept apart from potentially immature or dysfunctional, nascent  
361 subunits. Second, if nascent subunits were always mixed with old subunits, all subunits would have the  
362 same likelihood for being degraded, and destroying only just generated subunits by chance cannot be  
363 energetically favorable. Third, in case the protein synthesis apparatus is failing and translation halts,  
364 affected 80S ribosomes can be removed in a targeted and potentially conformation-selective fashion  
365 through ribophagy, allowing free nascent subunits to replace them. Collectively, a pool of 80S ribosomes  
366 distinct from free subunits should ensure a functionally tested and quantitatively attuned translational  
367 apparatus at all times.

### 368 **Translational Activity Regulates Ribophagic Flux**

369 Currently ribophagy is seen as a mechanism that is initiated by nutrient deprivation or mTOR inhibition  
370 to liberate the significant fraction of amino acids and nucleotides stored in ribosomes<sup>14,15,17,18,48</sup>. Indeed,  
371 starvation experiments in human cells saw clear enrichment for ribosomal and translation-associated  
372 proteins eliminated via autophagy over the course of 24 hours<sup>15</sup>. Both starvation and mTOR inhibition  
373 are unspecific ways for the induction of autophagy, raising the question in how far ribophagy is any  
374 different to general autophagy. Our data shows that ribophagy can be a distinct process acting on the  
375 time scale of minutes, when translation is directly inhibited. This rapid elimination of ribosomes is  
376 markedly different to the long term autophagic degradation of ribosomes upon mTOR inhibition or  
377 starvation, which occur on the time scale of several hours to days<sup>15,17</sup>. We propose that ribophagy is a  
378 substrate-driven process, where an increased 80S pool offers more chances to the autophagic  
379 machinery to degrade mature ribosomes. This means that ribophagy can be defined as a distinct  
380 autophagic process that reacts to the accumulation of idle 80S ribosomes. Under this definition, the actual  
381 ribophagic flux is determined by the availability of inactive 80S ribosomes and not by the activation  
382 status of the autophagy machinery itself. Interestingly, classic stimulation of autophagy via nutrient  
383 withdrawal or mTOR inhibition also lead to translation inhibition and a dramatic increase in inactive 80S  
384 ribosomes<sup>53</sup>, clarifying why ribophagy is seen as a subprocess of general autophagy. Our structural  
385 data indicates that an accumulation of inactive ribosomes in the POST-like state may flag 80S ribosomes  
386 for ribophagy, but whether and how their reduced conformational plasticity could serve as a degradation  
387 signal remains to be investigated. In summary, we propose that ribophagy is a normal subprocess of  
388 general autophagy during starvation, however, it is substrate-driven and can occur independently when  
389 translation halts and idle 80S ribosomes accumulate.

390



391 **References:**

- 392 1. Dikic, I. Proteasomal and Autophagic Degradation Systems. *Annu. Rev. Biochem.* **86**, 193–224  
393 (2017).
- 394 2. Wiśniewski, J. R., Hein, M. Y., Cox, J. & Mann, M. A ‘proteomic ruler’ for protein copy number  
395 and concentration estimation without spike-in standards. *Mol. Cell. Proteomics* 3497–3506  
396 (2014). doi:10.1074/mcp.M113.037309
- 397 3. Sung, M.-K., Reitsma, J. M., Sweredoski, M. J., Hess, S. & Deshaies, R. J. Ribosomal proteins  
398 produced in excess are degraded by the ubiquitin–proteasome system. *Mol. Biol. Cell* **27**, 2642–  
399 2652 (2016).
- 400 4. Sung, M. K. *et al.* A conserved quality-control pathway that mediates degradation of  
401 unassembled ribosomal proteins. *Elife* **5**, 1–28 (2016).
- 402 5. Lam, Y. W., Lamond, A. I., Mann, M. & Andersen, J. S. Analysis of Nucleolar Protein Dynamics  
403 Reveals the Nuclear Degradation of Ribosomal Proteins. *Curr. Biol.* **17**, 749–760 (2007).
- 404 6. Yanagitani, K., Juszkiwicz, S. & Hegde, R. S. UBE2O is a quality control factor for orphans of  
405 multiprotein complexes. *Science (80-. )*. **357**, 472–475 (2017).
- 406 7. Peña, C., Hurt, E. & Panse, V. G. Eukaryotic ribosome assembly, transport and quality control.  
407 *Nat. Struct. Mol. Biol.* **24**, 689–699 (2017).
- 408 8. Jackson, R. J., Hellen, C. U. T. & Pestova, T. V. The mechanism of eukaryotic translation  
409 initiation and principles of its regulation. *Nat. Rev. Mol. Cell Biol.* **11**, 113–127 (2010).
- 410 9. Dever, T. E. & Green, R. The Elongation, Termination, and Recycling Phases of Translation in  
411 Eukaryotes. *Cold Spring Harb. Perspect. Biol.* **4**, a013706–a013706 (2012).
- 412 10. Pisarev, A. V., Hellen, C. U. T. & Pestova, T. V. Recycling of eukaryotic posttermination  
413 ribosomal complexes. *Cell* **131**, 286–99 (2007).
- 414 11. Pisarev, A. V. *et al.* The Role of ABCE1 in Eukaryotic Posttermination Ribosomal Recycling. *Mol.*  
415 *Cell* **37**, 196–210 (2010).
- 416 12. Khatter, H. *et al.* Purification, characterization and crystallization of the human 80S ribosome.  
417 *Nucleic Acids Res.* **42**, e49–e49 (2014).
- 418 13. Khatter, H., Myasnikov, A. G., Natchiar, S. K. & Klaholz, B. P. Structure of the human 80S  
419 ribosome. *Nature* **520**, 640–645 (2015).
- 420 14. Kraft, C., Deplazes, A., Sohrmann, M. & Peter, M. Mature ribosomes are selectively degraded  
421 upon starvation by an autophagy pathway requiring the Ubp3p/Bre5p ubiquitin protease. *Nat.*  
422 *Cell Biol.* **10**, 602–610 (2008).
- 423 15. Gretzmeier, C. *et al.* Degradation of protein translation machinery by amino acid starvation-  
424 induced macroautophagy. *Autophagy* **13**, 1064–1075 (2017).
- 425 16. Kristensen, A. R. *et al.* Ordered Organelle Degradation during Starvation-induced Autophagy.  
426 *Mol. Cell. Proteomics* **7**, 2419–2428 (2008).
- 427 17. An, H., Ordureau, A., Körner, M., Paulo, J. A. & Harper, J. W. Systematic quantitative analysis  
428 of ribosome inventory during nutrient stress. *Nature* **583**, 303–309 (2020).
- 429 18. Wyant, G. A. *et al.* Nufip1 is a ribosome receptor for starvation-induced ribophagy. *Science (80-*  
430 *.)*. **360**, 751–758 (2018).
- 431 19. Liu, Y. *et al.* Autophagy-dependent rRNA degradation is essential for maintaining nucleotide  
432 homeostasis during *C. elegans* development. *Elife* **7**, e36588 (2018).
- 433 20. Trendel, J. *et al.* The Human RNA-Binding Proteome and Its Dynamics during Translational  
434 Arrest. *Cell* **176**, 391-403.e19 (2019).

- 435 21. Imami, K. *et al.* Phosphorylation of the Ribosomal Protein RPL12/uL11 Affects Translation during  
436 Mitosis. *Mol. Cell* 1–15 (2018). doi:10.1016/j.molcel.2018.08.019
- 437 22. Yap, M. G. S. *et al.* Multitagging Proteomic Strategy to Estimate Protein Turnover Rates in  
438 Dynamic Systems. *J. Proteome Res.* **9**, 2087–2097 (2010).
- 439 23. Welle, K. A. *et al.* Time-resolved Analysis of Proteome Dynamics by Tandem Mass Tags and  
440 Stable Isotope Labeling in Cell Culture (TMT-SILAC) Hyperplexing. *Mol. Cell. Proteomics* **15**,  
441 3551–3563 (2016).
- 442 24. Zecha, J. *et al.* Peptide Level Turnover Measurements Enable the Study of Proteoform  
443 Dynamics. *Mol. Cell. Proteomics* **17**, 974–992 (2018).
- 444 25. Zylber, E. A. & Penman, S. The effect of high ionic strength on monomers, polyribosomes, and  
445 puromycin-treated polyribosomes. *Biochim. Biophys. Acta - Nucleic Acids Protein Synth.* **204**,  
446 221–229 (1970).
- 447 26. Martin, T. E. & Hartwell, L. H. Resistance of active yeast ribosomes to dissociation by KCl. *J.*  
448 *Biol. Chem.* **245**, 1504–6 (1970).
- 449 27. Thoms, M. *et al.* Structural basis for translational shutdown and immune evasion by the Nsp1  
450 protein of SARS-CoV-2. *Science (80-. )*. **369**, 1249–1256 (2020).
- 451 28. Brown, A., Baird, M. R., Yip, M. C., Murray, J. & Shao, S. Structures of translationally inactive  
452 mammalian ribosomes. *Elife* **7**, 1–18 (2018).
- 453 29. Behrmann, E. *et al.* Structural snapshots of actively translating human ribosomes. *Cell* **161**, 845–  
454 857 (2015).
- 455 30. Shao, S. *et al.* Decoding Mammalian Ribosome-mRNA States by Translational GTPase  
456 Complexes. *Cell* **167**, 1229-1240.e15 (2016).
- 457 31. Zhou, Y. *et al.* Structural impact of K63 ubiquitin on yeast translocating ribosomes under  
458 oxidative stress. *Proc. Natl. Acad. Sci. U. S. A.* **117**, 22157–22166 (2020).
- 459 32. Kedersha, N. L., Gupta, M., Li, W., Miller, I. & Anderson, P. RNA-Binding Proteins Tia-1 and Tiar  
460 Link the Phosphorylation of Eif-2 $\alpha$  to the Assembly of Mammalian Stress Granules. *J. Cell Biol.*  
461 **147**, 1431–1442 (1999).
- 462 33. Huang, M.-T. Harringtonine, an Inhibitor of Initiation of Protein Biosynthesis. *Mol. Pharmacol.* **11**,  
463 511–519 (1975).
- 464 34. FRESNO, M., Jimenez, A., Vazquez, D., JIMÉNEZ, A. & VÁZQUEZ, D. Inhibition of Translation  
465 in Eukaryotic Systems by Harringtonine. *Eur. J. Biochem.* **72**, 323–330 (1977).
- 466 35. Ingolia, N. T., Lareau, L. F. & Weissman, J. S. Ribosome profiling of mouse embryonic stem cells  
467 reveals the complexity and dynamics of mammalian proteomes. *Cell* **147**, 789–802 (2011).
- 468 36. Nathans, D. PUROMYCIN INHIBITION OF PROTEIN SYNTHESIS: INCORPORATION OF  
469 PUROMYCIN INTO PEPTIDE CHAINS. *Proc. Natl. Acad. Sci.* **51**, 585–592 (1964).
- 470 37. Gao, X. *et al.* Quantitative profiling of initiating ribosomes in vivo. *Nat. Methods* **12**, 147–153  
471 (2015).
- 472 38. Liu, B. & Qian, S.-B. Characterizing inactive ribosomes in translational profiling. *Translation* **4**,  
473 e1138018 (2016).
- 474 39. Eichelbaum, K., Winter, M., Diaz, M. B., Herzig, S. & Krijgsveld, J. Selective enrichment of newly  
475 synthesized proteins for quantitative secretome analysis. *Nat. Biotechnol.* **30**, 984–990 (2012).
- 476 40. Eichelbaum, K. & Krijgsveld, J. Rapid temporal dynamics of transcription, protein synthesis, and  
477 secretion during macrophage activation. *Mol. Cell. Proteomics* **13**, 792–810 (2014).
- 478 41. An, H. & Harper, J. W. Systematic analysis of ribophagy in human cells reveals bystander flux

- 479 during selective autophagy. *Nat. Cell Biol.* **20**, 135–143 (2018).
- 480 42. Kong, A. T., Leprevost, F. V., Avtonomov, D. M., Mellacheruvu, D. & Nesvizhskii, A. I. MSFragger:  
481 ultrafast and comprehensive peptide identification in mass spectrometry–based proteomics. *Nat.*  
482 *Publ. Gr.* **293**, (2017).
- 483 43. Budkevich, T. V. *et al.* Regulation of the mammalian elongation cycle by subunit rolling: A  
484 eukaryotic-specific ribosome rearrangement. *Cell* **158**, 121–131 (2014).
- 485 44. Boisvert, F.-M. *et al.* A Quantitative Spatial Proteomics Analysis of Proteome Turnover in Human  
486 Cells. *Mol. Cell. Proteomics* **11**, M111.011429 (2012).
- 487 45. McShane, E. *et al.* Kinetic Analysis of Protein Stability Reveals Age-Dependent Degradation.  
488 *Cell* **167**, 803-815.e21 (2016).
- 489 46. Mancera-Martínez, E., Brito Querido, J., Valasek, L. S., Simonetti, A. & Hashem, Y. ABCE1: A  
490 special factor that orchestrates translation at the crossroad between recycling and initiation. *RNA*  
491 *Biol.* **14**, 1279–1285 (2017).
- 492 47. Pisareva, V. P., Skabkin, M. A., Hellen, C. U. T., Pestova, T. V. & Pisarev, A. V. Dissociation by  
493 Pelota, Hbs1 and ABCE1 of mammalian vacant 80S ribosomes and stalled elongation  
494 complexes. *EMBO J.* **30**, 1804–1817 (2011).
- 495 48. Van Den Elzen, A. M. G., Schuller, A., Green, R. & Séraphin, B. Dom34-Hbs1 mediated  
496 dissociation of inactive 80S ribosomes promotes restart of translation after stress. *EMBO J.* **33**,  
497 265–276 (2014).
- 498 49. Murakami, R. *et al.* The Interaction between the Ribosomal Stalk Proteins and Translation  
499 Initiation Factor 5B Promotes Translation Initiation. *Mol. Cell. Biol.* **38**, (2018).
- 500 50. Delarue, M. *et al.* mTORC1 Controls Phase Separation and the Biophysical Properties of the  
501 Cytoplasm by Tuning Crowding. *Cell* **174**, 338-349.e20 (2018).
- 502 51. Ceci, M. *et al.* Release of eIF6 (p27BBP) from the 60S subunit allows 80S ribosome assembly.  
503 *Nature* **426**, 579–584 (2003).
- 504 52. Gribling-Burrer, A. S. *et al.* A dual role of the ribosome-bound chaperones RAC/Ssb in  
505 maintaining the fidelity of translation termination. *Nucleic Acids Res.* **47**, 7018–7034 (2019).
- 506 53. Thoreen, C. C. *et al.* A unifying model for mTORC1-mediated regulation of mRNA translation.  
507 *Nature* **485**, 109–113 (2012).
- 508 54. Simonetti, A., Guca, E., Bochler, A., Kuhn, L. & Hashem, Y. Structural Insights into the  
509 Mammalian Late-Stage Initiation Complexes. *Cell Rep.* **31**, 107497 (2020).
- 510 55. Voorhees, R. M. & Hegde, R. S. Structures of the scanning and engaged states of the  
511 mammalian srp-ribosome complex. *Elife* **4**, 1–21 (2015).
- 512 56. Schmidt, C. *et al.* The cryo-EM structure of a ribosome–Ski2–Ski3–Ski8 helicase complex.  
513 *Science (80- )*. **354**, 1431–1433 (2016).
- 514 57. Bhaskar, V. *et al.* Dynamics of uS19 C-Terminal Tail during the Translation Elongation Cycle in  
515 Human Ribosomes. *Cell Rep.* **31**, 107473 (2020).
- 516 58. Brown, A., Shao, S., Murray, J., Hegde, R. S. & Ramakrishnan, V. Structural basis for stop codon  
517 recognition in eukaryotes. *Nature* **524**, 493–496 (2015).
- 518 59. Hughes, C. S. *et al.* Ultrasensitive proteome analysis using paramagnetic bead technology. *Mol.*  
519 *Syst. Biol.* **10**, 757 (2014).
- 520 60. Bertolini, M. *et al.* Interactions between nascent proteins translated by adjacent ribosomes drive  
521 homomer assembly. *Science (80- )*. **371**, (2021).
- 522 61. Cox, J. & Mann, M. MaxQuant enables high peptide identification rates, individualized p.p.b.-

- 523 range mass accuracies and proteome-wide protein quantification. *Nat. Biotechnol.* **26**, 1367–72  
524 (2008).
- 525 62. Ritz, C., Baty, F., Streibig, J. C. & Gerhard, D. Dose-response analysis using R. *PLoS One* **10**,  
526 1–13 (2015).
- 527 63. Zerbino, D. R. *et al.* Ensembl 2018. *Nucleic Acids Res.* **46**, D754–D761 (2018).
- 528 64. Durinck, S., Spellman, P. T., Birney, E. & Huber, W. Mapping identifiers for the integration of  
529 genomic datasets with the R/ Bioconductor package biomaRt. *Nat. Protoc.* **4**, 1184–1191 (2009).
- 530 65. Zivanov, J. *et al.* New tools for automated high-resolution cryo-EM structure determination in  
531 RELION-3. *Elife* **7**, 1–22 (2018).
- 532 66. Zheng, S. Q. *et al.* MotionCor2: Anisotropic correction of beam-induced motion for improved  
533 cryo-electron microscopy. *Nat. Methods* **14**, 331–332 (2017).
- 534 67. Zhang, K. Gctf: Real-time CTF determination and correction. *J. Struct. Biol.* **193**, 1–12 (2016).
- 535 68. Natchiar, S. K., Myasnikov, A. G., Kratzat, H., Hazemann, I. & Klaholz, B. P. Visualization of  
536 chemical modifications in the human 80S ribosome structure. *Nature* **551**, 472–477 (2017).
- 537 69. Pettersen, E. F. *et al.* UCSF Chimera - A visualization system for exploratory research and  
538 analysis. *J. Comput. Chem.* **25**, 1605–1612 (2004).
- 539 70. Zivanov, J., Nakane, T. & Scheres, S. H. W. A Bayesian approach to beam-induced motion  
540 correction in cryo-EM single-particle analysis. *IUCrJ* **6**, 5–17 (2019).
- 541 71. Wild, K. *et al.* MetAP-like Ebp1 occupies the human ribosomal tunnel exit and recruits flexible  
542 rRNA expansion segments. *Nat. Commun.* **11**, 1–10 (2020).
- 543 72. Nakane, T., Kimanius, D., Lindahl, E. & Scheres, S. H. W. Characterisation of molecular motions  
544 in cryo-EM single-particle data by multi-body refinement in RELION. *Elife* **7**, 1–18 (2018).
- 545 73. Farabella, I. *et al.* TEMPy: A Python library for assessment of three-dimensional electron  
546 microscopy density fits. *J. Appl. Crystallogr.* **48**, 1314–1323 (2015).
- 547 74. Eden, E., Navon, R., Steinfeld, I., Lipson, D. & Yakhini, Z. GOrilla: a tool for discovery and  
548 visualization of enriched GO terms in ranked gene lists. *BMC Bioinformatics* **10**, 48 (2009).
- 549 75. Wickham, H. *ggplot2*. (Springer International Publishing, 2016). doi:10.1007/978-3-319-24277-4
- 550 76. Klinge, S., Voigts-Hoffmann, F., Leibundgut, M., Arpagaus, S. & Ban, N. Crystal structure of the  
551 eukaryotic 60S ribosomal subunit in complex with initiation factor 6. *Science (80-. )*. **334**, 941–  
552 948 (2011).

553 **Acknowledgments:** We thank Jana Zecha (TU Munich, Germany) and Bernhard Küster (TU Munich,  
554 Germany) for help with implementing TMT-SILAC in MaxQuant. We thank Gregor Mönke (EMBL  
555 Heidelberg, Germany) for discussion and help on benchmarking PSN. We acknowledge the data  
556 storage service SDS@hd and bwHPC supported by the Ministry of Science, Research and the  
557 Arts Baden-Württemberg, as well as the German Research Foundation (INST 35/1314-1 FUGG  
558 and INST 35/1134-1 FUGG). We also acknowledge access to the infrastructure of the Cryo-EM  
559 Network at the Heidelberg University (HDcryoNET). This work was supported in part by the  
560 Excellence Cluster CellNetworks (to JK) and by an ERC Advanced grant 'Transfold' (to BB).

561 **Author contributions:** Conceptualization: JT, JK; Methodology: JT, MA, MB, MJ; Investigation: JT,  
562 MA, MB, MJ; Visualization: JT, MA, MJ; Funding acquisition: SP, BB, JK; Project  
563 administration: JT, JK; Supervision: GK, SP, BB, JK; Writing – original draft: JT, MA, SP, JK;  
564 Writing – review & editing: JT, MA, MB, MJ, GK, SP, BB, JK

565 All authors declare that they have no competing interests.

566 **Data availability:** Data is currently being uploaded to ProteomeXchange and EMDB.



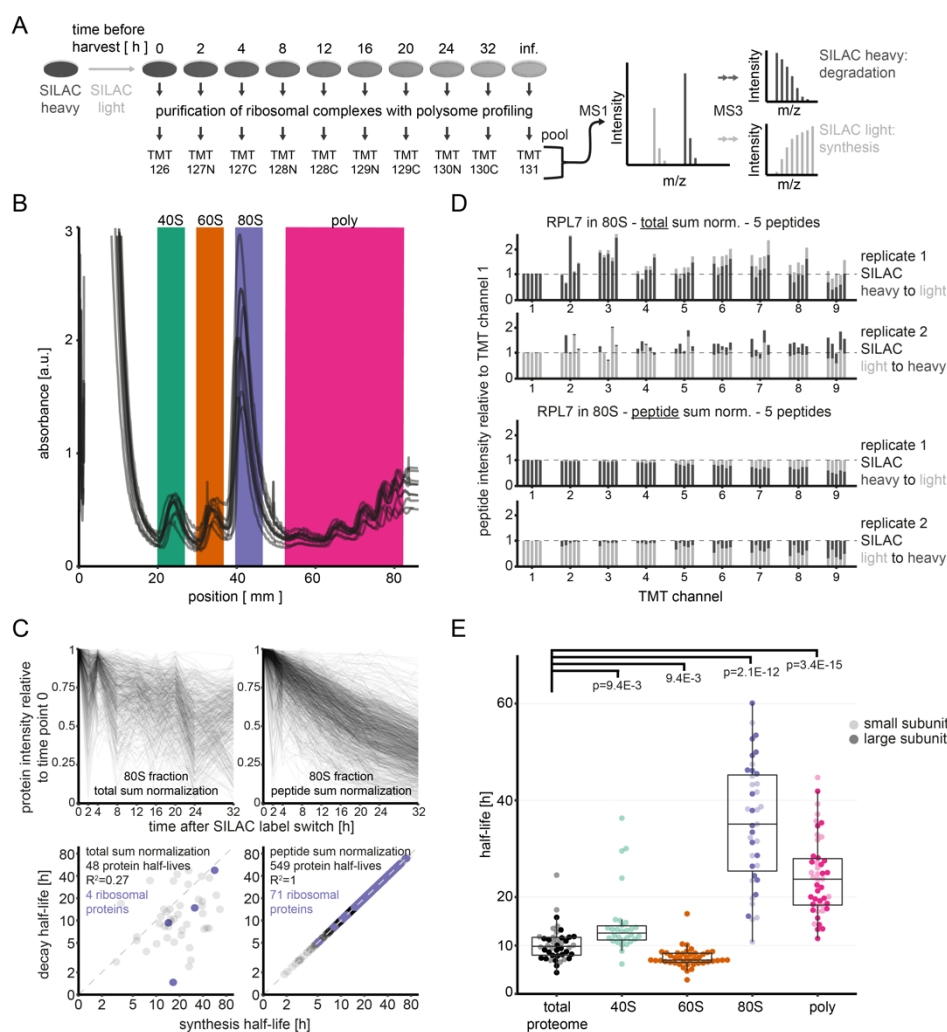

567 **Fig. 1: Comparing protein half-lives between the total proteome and ribosomal complexes.** A)  
 568 MS3-based pulsed-SILAC-TMT strategy for the determination of protein half-lives. SILAC heavy-  
 569 labelled cells are switched to SILAC light media to monitor protein degradation (SILAC heavy) and  
 570 synthesis (SILAC light) within ribosomal complexes over time. B) Polysome profiling demonstrating  
 571 reproducibility for the purification of ribosomal assemblies from MCF7 cells. Traces represent the nine  
 572 time points during a pulsed-SILAC experiment, and colors indicate fractions that were collected to  
 573 perform MS analysis and derive protein half-lives. C) Comparison of total sum (left panels) and peptide  
 574 sum normalization (right panels) for the determination of protein half-lives from purified ribosomal  
 575 complexes. Displayed is exemplary data for the 80S fraction as purified in B from MCF7 cells. Top  
 576 panels show protein decay curves used for model fitting and computation of decay half-lives below.  
 577 Bottom panels show scatterplots comparing protein synthesis and decay half-lives with purple coloring  
 578 indicating ribosomal proteins. Note logarithmic scaling. D) Barplots showing the TMT peptide intensities  
 579 from the light (light grey) and heavy (dark grey) SILAC channels for the five peptides of RPL7 quantified  
 580 in the 80S fraction. Intensities are normalized to TMT channel 1 for comparison. Top two panels show  
 581 data from two biological replicates with SILAC label-swap normalized with total sum normalization,  
 582 bottom two panels the same data normalized with peptide sum normalization. E) Boxplots illustrating  
 583 half-lives of ribosomal proteins across different cellular contexts. Displayed are means between  
 584 biological duplicates with SILAC label swap. Proteins known to be part of the small ribosomal subunit  
 585 are colored pale, large subunit proteins bold. For the 40S fraction only small subunit proteins are shown,  
 586 for the 60S fraction only large subunit proteins (see also Fig. S1B). Pairwise testing occurred with a  
 587 Wilcox ranksum test for proteins shared between the total proteome and each of the other experiments  
 588 as displayed.

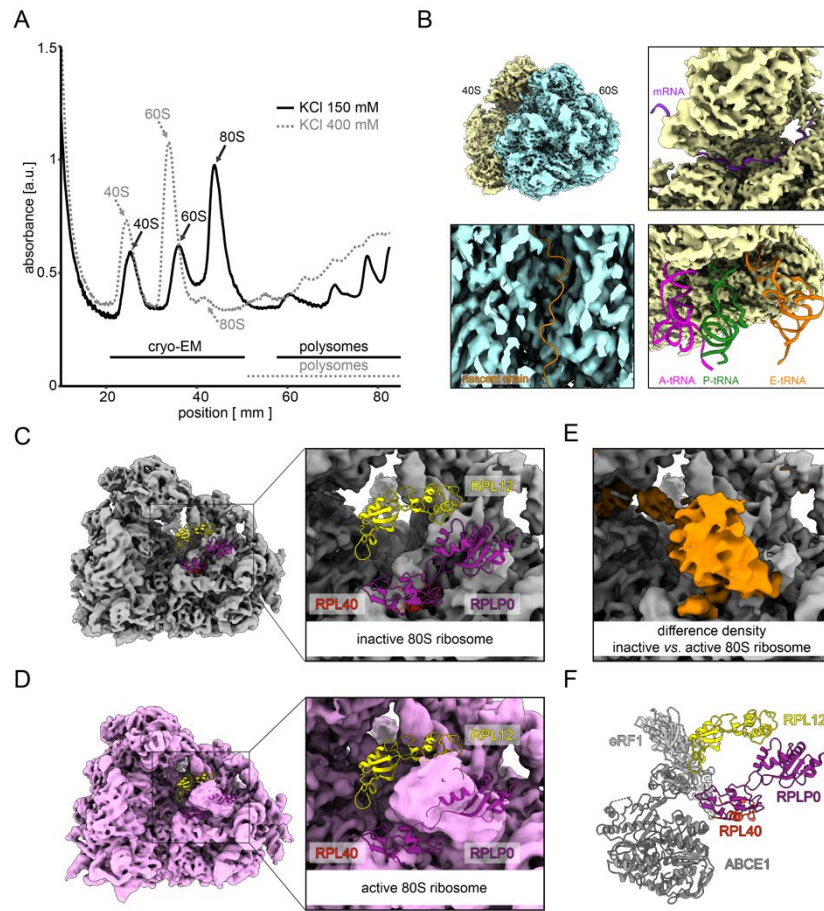

589 **Fig. 2: Cryo-EM analysis of non-polysomal ribosomal complexes from MCF7 cells.** A) Polysome  
590 profiling of MCF7 cells under low and high salt conditions. Ribosomes associated with mRNA remain in  
591 their 80S assembly state under high salt, whereas empty 80S ribosomes dissociated into 40S and 60S  
592 subunits. Fractions combined and investigated with cryo-electron microscopy are indicated. B) Top left:  
593 local-resolution-filtered cryo-EM density of inactive human 80S ribosomes after 3D multi-body  
594 refinement. Large (blue; 3.09 Å global resolution) and small (yellow; 3.72 Å global resolution) ribosomal  
595 subunits are indicated. 60S, large 60S ribosomal subunit; 40S, small 40S ribosomal subunit. Top right:  
596 the mRNA channel is devoid of density for an mRNA molecule (PDB-6YAL)<sup>54</sup>. Bottom left: density of the  
597 60S subunit cut through the polypeptide exit tunnel. The ribosomal exit tunnel site is devoid of density  
598 for a nascent polypeptide (PDB-3JAJ)<sup>55</sup>. Bottom right: the intersubunit space is vacant and devoid of  
599 density for tRNAs (PDB-5MC6 and PDB-5LZV)<sup>30,56</sup>. C&D) Comparison of the inactive (C) and active  
600 human ribosome (D) (EMD-10674)<sup>57</sup>. In both cases, cryo-EM densities are shown at 6-Å resolution for  
601 clarity. Atomic models for the components of the P-stalk area have been superposed (PDB-3JAJ)<sup>58</sup>. E)  
602 Zoomed view of positive difference density (in orange) calculated by the subtraction of the reconstruction  
603 shown in C from the reconstruction shown in D. Parts of C colored as previously. F) Positions of eRF1  
604 and ABCE1 relative to RPL40 and the stalk base proteins RPLP0 and RPL12 (PDB-3JAJ)<sup>58</sup>.

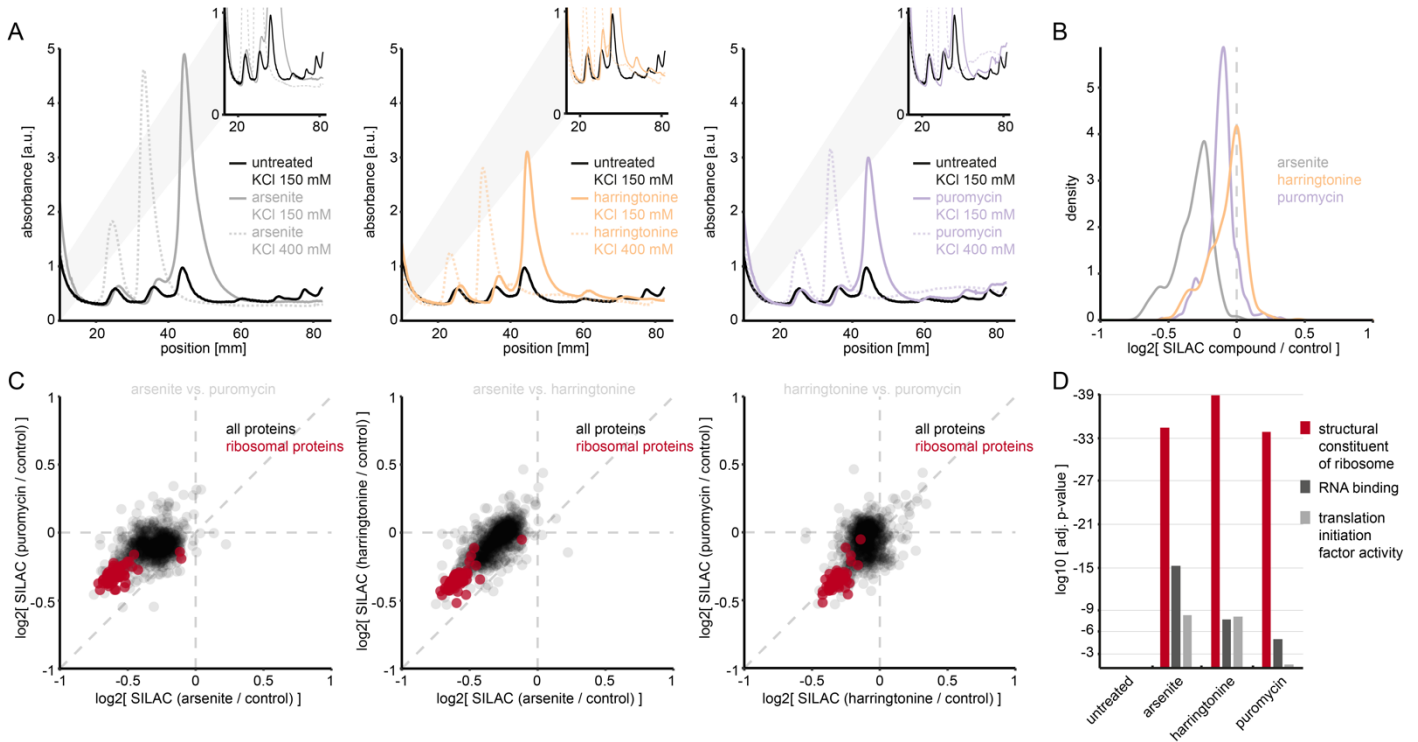

605 **Fig. 3: Translation inhibitors expand the pool of inactive 80S ribosomes and induce ribophagy.**

606 A) Polysome profiling of MCF7 cells upon translation inhibition. Cells were treated 30 minutes with  
 607 indicated translation inhibitors and subjected to high and low salt polysome profiling. B) Density plot for  
 608 expression changes in the total proteome of MCF7 cells upon translation inhibition. Cells of one SILAC  
 609 label were treated with the indicated translation inhibitor and compared to untreated cells of the  
 610 complementary SILAC label. Normalization occurred to control samples where both SILAC channels  
 611 were untreated (for details see Materials and Methods). Shown are means of quadruplicates with label  
 612 swap filtered for a variance smaller 20 %. D) Scatterplot comparing expression changes in MCF7 cells  
 613 upon arsenite, harringtonine and puromycin treatment. Same data as in B. Cytosolic ribosomal proteins  
 614 are highlighted in red. E) Ranked GO enrichment analysis (molecular function) for proteins with  
 615 decreased expression in MCF7 cells upon translation inhibition. Compared are the top-three enriched  
 616 terms upon arsenite treatment and their significance levels under different treatment regimens.

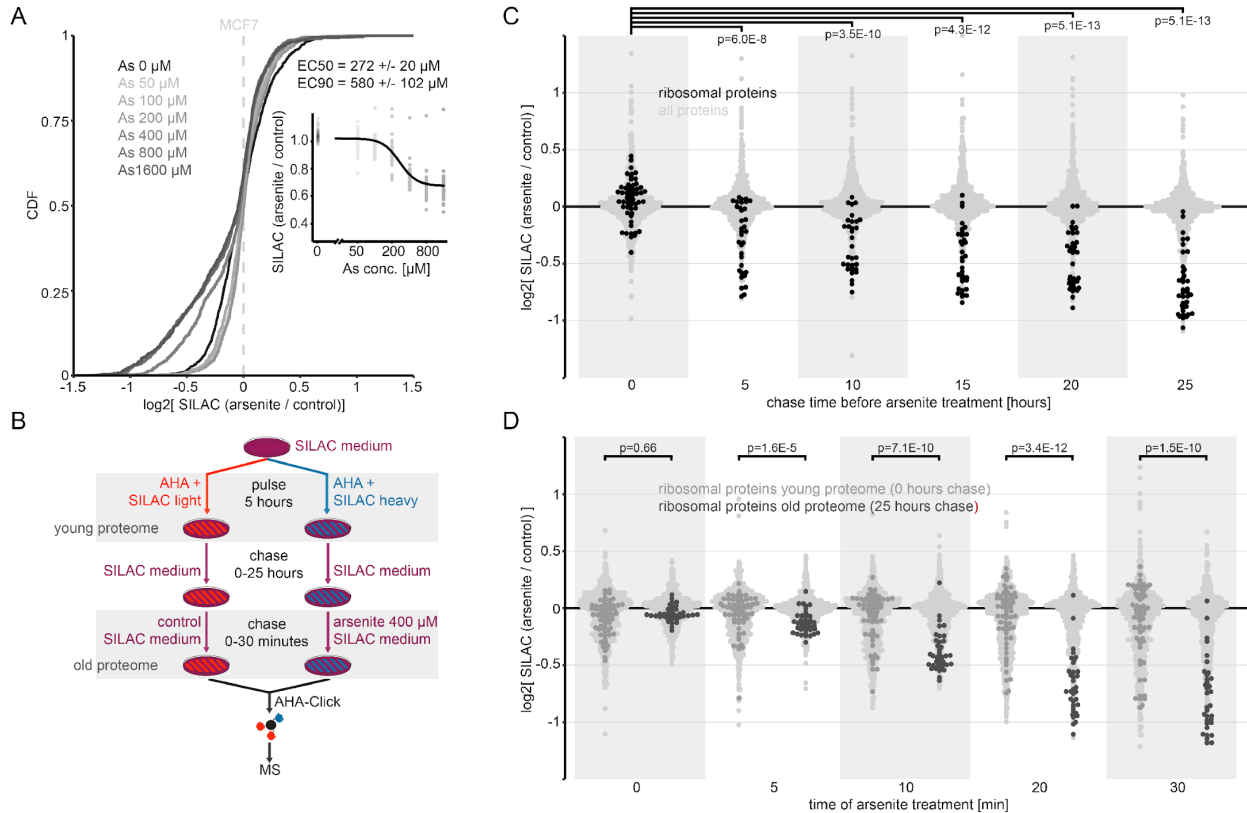

617 **Fig. 4: Translational arrest induces degradation of old ribosomes.** A) Cumulative distribution of  
 618 expression changes in the total proteome of MCF7 cells upon increasing doses of arsenite added for 30  
 619 minutes of treatment. Insert: Log-logistic model fit against fold-changes of cytosolic ribosomal proteins  
 620 at different arsenite concentrations. Each dot represents one cytosolic ribosomal protein. B) Proteomic  
 621 pulse-chase workflow for analysing the effect of protein age on arsenite-induced autophagy. For details  
 622 see Materials and Methods. C) Dotplot comparing arsenite-induced autophagy within MCF7 proteomes  
 623 of different ages (5-25 h). Black dots represent cytosolic ribosomal proteins, light grey dots all other  
 624 identified proteins. Shown are means of duplicate experiments with label swap filtered for a variance  
 625 smaller 20 %. Pairwise testing occurred for ribosomal proteins with a Wilcox ranksum test between time  
 626 point 0 hours and each of the other time points as displayed. D) Dotplot comparing arsenite-induced  
 627 autophagy between the old and new MCF7 proteome directly. Black dots represent cytosolic ribosomal  
 628 proteins in the old proteome (25 h chase), orange dots cytosolic ribosomal proteins in the new proteome  
 629 (0 h chase), light grey dots all other identified proteins. Shown are means of duplicate experiments with  
 630 label swap filtered for a variance smaller 20 %. Pairwise testing occurred with a Wilcox ranksum test  
 631 between ribosomal proteins of the young and old proteome as displayed.



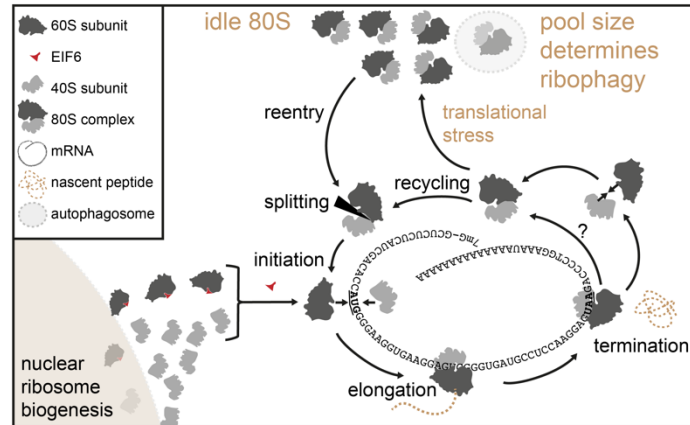

632 **Fig. 5: Schematic representation of the ribosome lifecycle in human cells.** Translation-competent  
633 ribosomal subunits are stored in inactive 80S ribosomes after translation to keep them separate from  
634 nascent subunits carrying anti-association factors.

635 **Supplementary Materials:**

- 636 Figs. S1: Proteomic quantification of MCF7 polysome profiling fraction and comparison of  
637 normalization procedures for TMT-SILAC data.
- 638 Figs. S2: Benchmarking peptide sum normalization.
- 639 Figs. S3: Cryo-EM processing workflow for ribosomal complexes with and without arsenite treatment.
- 640 Figs. S4: Local resolution estimation and Fourier shell correlation curves.
- 641 Figs. S5: Identification of LYAR and IFRD2 bound to translationally inactive 80S ribosomes without  
642 and with arsenite treatment.
- 643 Figs. S6: Cryo-EM structure of the inactive human 80S ribosome after arsenite treatment.
- 644 Figs. S7: Arsenite treatment constrains conformational plasticity of the inactive 80S ribosome.
- 645 Figs. S8: Identification of eIF6 bound to 60S ribosomal subunits without arsenite treatment.
- 646 Table S1: Label-free quantification of proteins in MCF7 polysome profiling fractions.
- 647 Table S2: Protein half-lives from the MCF7 total proteome and MCF7 polysome profiling fractions.
- 648 Table S3: Changes in the MCF7 total proteome upon translation inhibition.

## 649 **Materials and Methods**

650

### 651 **Cell Culture and SILAC**

652 The cell lines MCF7 (ATCC, RRID:CVCL\_0031) and HeLa (ATCC, RRID:CVCL\_0030) were maintained  
653 in Dulbecco's Modified Eagle's Medium (DMEM) for SILAC supplemented with 10% dialysed FBS  
654 (Gibco 26400-044) and Pen-Strep (100 U / ml penicillin, 100 mg / ml streptomycin, Gibco 15140-122)  
655 at 37 °C, 5 % CO<sub>2</sub>. DMEM for SILAC (Silantes 280001300) was supplemented with 1 mM L-lysine and  
656 0.5 mM L-arginine of the individual SILAC labels (Silantes 211104113, 201204102, 211604102,  
657 201604102) as well as 1.7 mM light L-proline and 1 x GlutaMAX (Gibco 35050061). For full labelling the  
658 intermediate or heavy SILAC label was introduced during six passages in intermediate or heavy DMEM  
659 for SILAC, respectively. All experiments were performed on MCF7 cells, except when confirming the  
660 dose-response of arsenite treatment on HeLa cells (Fig. S5B). Cells were seeded at a density so that  
661 they reached 70 % confluence after three days of expansion in culture (1 million MCF7 cells for a 15 cm  
662 culture dish). Except for the protein half-life experiments, all experiments were performed three days  
663 after seeding. The cell culture timing for the protein half-life experiments is detailed below.

664

### 665 **Purification of Total Proteomes for Proteomics Using Single-Pot-Solid-Phase-Enhanced- 666 Sample-Preparation (SP3)**

667 For proteomic sample preparation of total proteomes a modified version of the SP3 protocol was used  
668 <sup>59</sup>. Cell pellets or lysates were topped off to a total volume of 900 µl with SP3 lysis buffer (tris-Cl 50 mM,  
669 SDS 0.05 %, DTT 10 mM). Lysis was facilitated by pipetting and vigorous vortexing. Samples were  
670 reduced at 90 °C, 700 rpm shaking, for 30 minutes and then cooled on ice. Twenty µl CAA 1 M was  
671 added along with 1 µl benzonase (Novagen 70664) and samples incubated 2 hours at 37 °C, 700 rpm  
672 shaking. One hundred µl denaturation solution (EDTA 200 mM, SDS 10 %) was added and samples  
673 vigorously vortexed. Four hundred µl SP3 (GE 44152105050250) beads were preconditioned by  
674 washing with 1 ml MilliQ water 3 times, before reconstitution in 1 ml MilliQ water. Twenty µl  
675 preconditioned SP3 beads were mixed to the samples by vortexing. One ml acetonitrile was added and  
676 binding of proteins occurred for 15 minutes at room temperature. Beads were captured on a magnetic  
677 rack, supernatants discarded and beads washed three times with 2 ml EtOH 70%, while attached to the  
678 magnet. Tubes were spun down and put back on the magnet in order to remove all residual EtOH.  
679 Beads were taken up in 100 µl TEAB 20 mM (Sigma T7408) containing 500 ng trypsin/LysC (Promega  
680 V5073) and digested for 16 hours at 37 °C, 700 rpm. Subsequently, peptides were cleaned up using an  
681 Oasis PRiME HKB µElution Plate. Peptides were taken up in 15 µl formic acid 1 % before analysis by  
682 HPLC-MS with the method detailed in each specific experimental section or 80 µl high pH buffer  
683 (NH<sub>4</sub>COOH 20 mM) for fractionation at high pH, or 20 µl TEAB 20 mM for TMT-labelling, as outlined  
684 below.

685

### 686 **Purification of Ribosomal Complexes by Polysome Profiling and an SP3 Modification for the 687 Proteomic Sample Preparation from Sucrose Gradient Fractions**

688 For one polysome profiling experiment approx. 10 million MCF7 cells grown on a 15 cm dish were used.  
689 The media was discarded and residual media removed by tapping the culture dish onto a paper towel.  
690 Cells were rinsed with 10 ml ice-cold harvest buffer (MgCl<sub>2</sub> 10 mM, cycloheximide (Santa Cruz sc-  
691 3508A) 100 µg/ml in PBS), which was subsequently discarded and again residues removed by tapping  
692 the culture dish onto a paper towel. The dish was transferred onto ice and cells scraped into 100 µl ice-  
693 cold lysis buffer 5 x (NP40 5 %, tris-Cl 250 mM, MgCl<sub>2</sub> 50 mM, KCl 700 mM, cycloheximide 500 µg/ml,  
694 DTT 5 mM, 1 x EDTA-free protease inhibitor (Roche 11873580001), to 100 µl add 15 µl DNase I and  
695 1.5 µl RNAsin Plus (Promega) before use), which becomes diluted to 1x with residual PBS on the dish  
696 surface.<sup>60</sup> Lysates were transferred to a fresh tube, vortexed and incubated on ice for 10 minutes before  
697 passing through a 26-gauge needle 10 times in order to shear genomic DNA. Consequently, samples  
698 were cleared by centrifugation with 20000 g at 4 °C for 5 minutes. Sucrose gradients of 5-45 % were  
699 prepared in sucrose buffer (tris-Cl 50 mM, MgCl<sub>2</sub> 10 mM, KCl 140 mM or 400 mM, 1 x EDTA-free

700 protease inhibitor, cycloheximide 100 µg/ml) on a BIOCAMP153 gradient station (BioComp  
701 Instruments). Supernatants were transferred onto the sucrose gradients and subjected to 3.5 hours of  
702 ultracentrifugation with 35000 rpm in a Sorvall WX90 ultracentrifuge (Beckman) and the rotor SW40Ti.  
703 Gradients were then collected into 60 fractions using a BIOCAMP153 gradient station. Subfractions  
704 representing the 40S, 60S, 80S and polysome fractions were combined according to the UV trace. For  
705 one experiment series identical subfractions were combined, however, the exact fraction numbers  
706 varied slightly between experiment series and were adapted accordingly.

707

708 As the sucrose gradient in the polysome profiling contained KCl, which precipitates SDS, we used a  
709 modification of the SP3 protocol presented above. The total volume of the combined fractions amounted  
710 to approximately 1 ml for the 40S, 60S and 80S fractions, of which 900 µl were transferred to a 2 ml  
711 tube. Ten µl DTT 1 M was added and samples were reduced at 90 °C, 700 rpm shaking, for 30 minutes  
712 and then cooled on ice. Twenty µl CAA 1 M was added along with 1 µl benzonase and samples  
713 incubated 2 hours at 37 °C, 700 rpm shaking. One hundred µl denaturation solution (EDTA 200 mM, 20  
714 M guanidinium chloride) was added and samples vigorously vortexed. Four hundred µl SP3 beads were  
715 preconditioned by washing with MilliQ water 3 times, before reconstitution in 1 ml MilliQ water. Twenty  
716 µl preconditioned SP3 beads were mixed to the samples by vortexing, before addition of 1 ml  
717 acetonitrile. Binding of proteins occurred for 15 minutes at room temperature. Beads were captured on  
718 a magnetic rack, supernatants discarded and beads washed three times with 2 ml EtOH 70%, while  
719 attached to the magnet. An additional round of washing was performed were beads were taken off the  
720 magnet and disintegrated into 1 ml EtOH 70 %. Samples were put back onto the magnet in order to  
721 remove all EtOH. Beads were taken up in 100 µl TEAB 20 mM containing 500 ng trypsin/LysC and  
722 digested for 16 hours at 37 °C, 700 rpm and peptides cleaned up using a Oasis PRiME HKB µElution  
723 Plate. Peptides were taken up in 15 µl formic acid 1 % before analysis by HPLC-MS with the method  
724 detailed in each specific experimental section or 20 µl TEAB 20 mM for TMT-labelling.  
725 An exception was the polysome fraction, where the combined volume of the subfractions was  
726 approximately 4 ml. These 4 ml were collected in a 15 ml falcon tube and treated analogously to the  
727 other fractions. Volumes were adjusted except for benzonase and SP3 beads, for which volumes were  
728 kept the same. After collecting the SP3 beads on a 15 ml magnetic rack and discarding the supernatant,  
729 beads were taken up in two times 1 ml EtOH 70 % in order to be transferred to a fresh 2 ml tube. From  
730 that point on samples were treated identically to the other fractions.

731

### 732 **Determination of Protein Half-Lives by TMT-SILAC**

733 For all protein half-life measurements two replicates were generated from MCF7 cells that included a  
734 SILAC label swap. Explicitly, one replicate was produced from SILAC heavy cells switched to light SILAC  
735 media and another replicate from SILAC light cells switched to heavy SILAC media.  
736 For determining half-lives of the total proteome seven timepoints were generated. In the case of the total  
737 proteome 1 million MCF7 cells of one SILAC label were seeded on 15 cm dishes and expanded for 3  
738 days. Subsequently, the media was discarded, cells were washed twice with PBS to remove residual  
739 media before addition of new media with the complementary SILAC label. Cells were harvested after  
740 additional 0, 1, 2, 4, 8, 16 and 32 hours of culture after switching the SILAC media. For the harvest,  
741 media was discarded, cells put on ice and scraped into 10 ml ice-cold PBS and transferred to a falcon  
742 tube. Residual cells were scraped into another 10 ml ice-cold PBS, combined with the rest and spun  
743 down for 5 minutes with 1000 g at 4 °C. Cells were lysed in 1 ml SP3 lysis buffer (tris-Cl 50 mM, SDS  
744 0.05 %, DTT 10 mM) by vigorous pipetting and vortexing before 200 µl of the lysate was used for further  
745 purification by conventional SP3 as outlined above.

746

747 For determining half-lives of proteins in polysome fractions again two replicates with label-swap were  
748 generated. However, in order to increase the resolution of our analysis nine timepoints were taken. As  
749 the quality of polysome profiling suffers if samples are frozen, all cells were harvested at the same time.  
750 This required that the SILAC media was changed at appropriate time distances towards one common



751 harvest point. Therefore, 1.3 million MCF7 cells of one SILAC label were seeded onto 15 cm dishes and  
752 harvested after a total of 4 days in culture. Cells were washed twice with PBS and switched to the  
753 complementary SILAC label 0, 2, 4, 8, 12, 16, 20, 24 and 32 hours before those 4 days had passed.  
754 Cell harvest, polysome profiling and protein clean-up occurred as described above.  
755 In the case of the total proteome the first 2-7 TMT channels were occupied by the time points 1-32  
756 hours, the TMT channel 8 and 10 by replicates of the infinity time point (for the replicate starting from  
757 SILAC light cells the infinity timepoint were SILAC heavy cells and *vice versa*) and the channels 1 and  
758 9 by replicates of the time point 0. Replicate channels were produced from the same peptides in order  
759 to assess the reproducibility within one experiment. The reproducibility was found very good for all  
760 replicates so that for the polysome profiling experiments all channels were used for time points, i.e. for  
761 polysome profiling fractions the time points 0-32 hours were allocated to the TMT channels 1-9 and the  
762 infinity time point to TMT channel 10.

763  
764 In order to label identical amounts of peptides for each TMT channel, peptide concentrations were  
765 assessed using a Quantitative Colorimetric Peptide Assay (Pierce 23275) on 10 % of each sample. The  
766 amount of peptides that were labelled was oriented on the sample with the lowest peptide concentration  
767 in one particular experiment series. In the case of the total proteome 10 µg peptides per time point were  
768 used, in the case of the polysome fractions 5 µg of peptides were used. Identical amounts of peptides  
769 for each timepoint were adjusted to a total volume of 20 µl in TEAB 50 mM. Consequently, 5 µl of TMT  
770 labelling reagent in acetonitrile (Thermo 90113, see manufacturer manual for dilution) was added and  
771 labelling allowed to occur for 1 hour at room temperature. Labelling was quenched by addition of 1.5 µl  
772 hydroxylamine 5 % and another 15 minutes of incubation. Samples for all 10 TMT channels of one  
773 experiment were combined, completely dried by SpeedVac and taken up in 80 µl high-pH buffer  
774 (NH<sub>4</sub>COOH 20 mM) for fractionation at high pH as described below. In the case of the total proteome  
775 replicates were analysed in 16 fractions. Therefore, the first 8 of the 40 collected fractions were  
776 discarded and the following combined to 16 fractions using the scheme 1+17/.../16+32. In the case of  
777 the polysome profiling experiments, samples were analyzed in 8 fractions. Therefore, the first 8 of the  
778 40 collected fractions were discarded and the following combined to 8 fractions using the scheme  
779 1+9+17+25/.../8+16+24+32.

780 Fractions were again dried down completely and taken up in 15 µl formic acid 1 % before analysis by  
781 MS. HPLC-MS occurred on a Fusion MS using the 2 hour gradient described below and the standard  
782 SPS-MS3 method for TMT recommended by the manufacturer.

783

#### 784 **Azidohomoalanine (AHA) Labelling for the Extraction of Proteomes of Different Ages**

785 Briefly, in order to monitor the effect of arsenite on MCF7 sub-proteomes that were aged 0-25 hours,  
786 intermediate SILAC-labelled MCF7 cells were pulsed for five hours with either SILAC heavy or SILAC  
787 light labels, respectively, in the presence of AHA (Jena Bioscience CLK-AA005). Subsequently, this  
788 'young' proteome was allowed to age by chasing cells with intermediate SILAC media without AHA for  
789 0-25 hours at five-hour intervals. Heavy-labelled cells from each age group were then treated with  
790 arsenite (Santa Cruz sc-301816) for 30 minutes to induce autophagy, which were then combined with  
791 light-labelled untreated cells, and subjected to click-chemistry to selectively isolate the aged AHA-  
792 labelled proteomes. Finally, upon MS the heavy-over-light SILAC ratio was used to determine arsenite-  
793 induced effects on the proteome for each age group, whereas background signal was relegated to the  
794 intermediate SILAC channel.

795

796 Explicitly, cells were first subjected to AHA-labelling. Therefore, 1.4 million SILAC intermediate MCF7  
797 cells were expanded on 15 cm dishes for 3 days in standard SILAC intermediate DMEM (see  
798 Mammalian Cell Culture and Stable Cell Lines). The media was discarded, cells washed twice with PBS  
799 and depletion media (reduced component DMEM (AthenaES 0430), sodium bicarbonate 3.7 g/l, Sodium  
800 Pyruvate 1 mM, HEPES 10 mM, GlutaMax 1 x, L-proline 300 mg/l, L-cystine 63 mg/L, L-leucine 105  
801 mg/l, dialyzed FBS 10 %) added for 1 hour of incubation at normal culture conditions. The depletion

802 media was discarded and replaced by labelling media (depletion media supplemented with L-lysine 146  
803 mg/l, L-arginine 84 mg/l, L-azidohomoalanine 18.1 mg/l) for 5 hours of incubation at normal culture  
804 conditions. Note that the SILAC heavy and light labels were introduced via the labelling media and  
805 during the 5 hours of AHA-labelling. Subsequently, cells were washed twice with PBS and incubated in  
806 standard SILAC intermediate DMEM for 0-25 hours of label chase. Following the chase period AHA-  
807 SILAC-heavy cells were treated with 400  $\mu$ M arsenite for 0-30 minutes, while AHA-SILAC-light cells  
808 were left untreated. Simultaneously a second replicate was produced with SILAC label swap. The media  
809 was discarded and cells were transferred onto ice. Cells were harvested into 10 ml ice-cold PBS by  
810 scraping and transferred to a falcon tube. Residual cells were scraped into another 10 ml, which were  
811 combined with the first, and spun down with 1000 g for 5 minutes at 4 °C. Supernatants were discarded  
812 and AHA-labelled proteins enriched using the Click-it Protein Enrichment kit (Invitrogen C10416)  
813 according to the instructions of the manufacturer. Proteins were eluted from the beads into 200  $\mu$ l  
814 digestion buffer (tris-Cl 100 mM, acetonitrile 5 %, CaCl<sub>2</sub> 2 mM) containing 500 ng trypsin/LysC during  
815 16 hours incubation at 37 °C, 1000 rpm shaking in 2 ml tubes. Peptides were cleaned up using an Oasis  
816 PRiME HKB  $\mu$ Elution Plate and taken up in 15  $\mu$ l formic acid 1 % before analysis by HPLC-MS on a  
817 QExactive HF with the standard method outlined below.

818

### 819 **Quantification of Ribophagy Upon Translation Inhibition**

820 During conventional SILAC experiments for the effect of arsenite-treated against untreated cells we  
821 observed that unnormalized ratios were always more extreme than the ratios presented by MaxQuant's  
822 standard SILAC normalization, independent of the SILAC channels used for the comparison. This  
823 indicated that most of the cytosolic proteome was affected by bystander autophagy, so that  
824 normalization to the median ratio between SILAC channels underestimated the arsenite-induced  
825 degradation effect. To capture this effect and still be able to correct for small differences in the number  
826 of cells used for each SILAC channel we took two measures: First, we started out from a single  
827 population of SILAC intermediate-labelled MCF7 cells (Lys4, Arg6), of which we seeded 0.2 million cells  
828 onto 3.5 cm dishes and expanded them in either SILAC heavy (Lys8, Arg10) or SILAC light (Lys0, Arg0)  
829 media for 3 days. Second, we combined quadruplicates of heavy and light labelled cells, which were  
830 both left untreated in order to define the exact difference between the two SILAC channels. The mean  
831 ratio for each of the proteins detected in these samples was used as a correction factor to normalize for  
832 mixing errors in the treated samples. Treatment occurred for 30 minutes with 400  $\mu$ M arsenite, 200  $\mu$ M  
833 puromycin (Gibco A1113803) or 20  $\mu$ M harringtonine (Sigma SML1091), respectively. Treatments  
834 occurred on quadruplicates with label-swap, i.e. two dishes of light cells were treated and compared to  
835 two dishes of untreated heavy cells, and *vice versa* for the label swap. Total proteomes were extracted  
836 by SP3 as described above and samples analyzed on 2-hour gradients by HPLC-MS on a QExactive  
837 HF with the standard method outlined below.

838

### 839 **High pH Reversed-Phase Fractionation of Proteomic Samples**

840 Fractionation at high pH occurred on an Agilent Infinity 1260 LC system (Agilent) using a Phenomenex  
841 Gemini 3  $\mu$ M C18, 100 x 1 mm column (Phenomenex). Buffer A was NH<sub>4</sub>COOH 20 mM, buffer B was  
842 100 % acetonitrile. The following gradient was used for all applications described in this manuscript: 0-  
843 2 minutes 0 % B, 2-60 minutes linear gradient to 65 % B, 61-62 minutes linear gradient to 85 % B, 62-  
844 67 minutes 85 % B, 67-85 minutes 0 % B. Eluates were collected in 40 fractions and combined as  
845 described in the individual paragraphs. The initial 8 fractions up to approximately 18 % B contained in  
846 samples extracted polysome fractionation RNA contaminations and were therefore discarded. For  
847 consistency this occurred for all other samples as well.

848

### 849 **HPLC-MS for the Detection and Quantification of Proteomic Samples**

850 Separation by HPLC prior to MS occurred on an Easy-nLC1200 system (Thermo Scientific) using an  
851 Acclaim PepMap RSCl 2  $\mu$ M C18, 75  $\mu$ m x 50 cm column (Thermo Scientific) heated to 45 °C with a  
852 MonoSLEEVE column oven (Analytical Sales and Services). Buffer A was 0.1 % formic acid, buffer B

853 was 0.1 % formic acid in 80 % acetonitrile. The following gradient was used for all applications described  
854 in this manuscript: 0 minutes 3% B, 0-4 minutes linear gradient to 8 % B, 4-6 minutes linear gradient to  
855 10 % B, 6-74 minutes linear gradient to 32 % B, 74-86 minutes linear gradient to 50 % B, 86-87 minutes  
856 linear gradient to 100 % B, 87-94 minutes 100 % B, 94-95 linear gradient to 3 % B, 95-105 minutes 3 %  
857 B.

858 MS detection occurred on either a QExactive HF or Fusion mass spectrometer (Thermo Scientific) with  
859 the method specified in the experimental outlines above. Standard method for the QExactive HF was  
860 MS1 detection at 120000 resolution, AGC target 3E6, maximal injection time 32 ms and a scan range  
861 of 350-1500 DA. MS2 occurred with stepped NCE 26 and detection in top20 mode with an isolation  
862 window of 2 Da, AGC target 1E5 and maximal injection time of 50 ms. Standard method for the Fusion  
863 was MS1 detection in orbitrap mode at 60000 resolution, AGC target 1E6, maximal injection time 50 ms  
864 and a scan range of 375-1500 DA. MS2 detection occurred with an HCD collision energy of 33 in ion  
865 trap top20 mode with an isolation window of 1.6 Da, AGC target 1E4 and maximal injection time of 50  
866 ms.

867

### 868 **MS Database Search**

869 All MS raw files were searched using MaxQuant (1.6.0.16)<sup>61</sup>. The database searched was the reviewed  
870 UniProt human proteome (search term: 'reviewed:yes AND proteome:up000005640', 20216 entries,  
871 retrieved 11 September 2017) and the default Andromeda list of contaminants. All settings were used  
872 at their default value, except for specifying SILAC configurations and indicating the appropriate number  
873 of fractions per sample. For the label-free quantification of ribosomal proteins in polysome profiling  
874 fractions, for the quantification of new and old proteins in MCF7 sub-proteomes purified with AHA-  
875 labelling, and for the quantification of ribophagy upon translation inhibition the 'match-between-runs'  
876 option was activated. For the quantification of new and old proteins in MCF7 sub-proteomes purified  
877 with AHA-labelling, additionally, the 'requantify' option was activated. For the label-free quantification of  
878 ribosomal proteins in polysome profiling fractions iBAQ quantification was activated.  
879 TMT-SILAC data was searched with the parameters adapted from Zecha et al.<sup>24</sup>. TMT isotope impurities  
880 were specified in Andromeda according to the information provided by the manufacturer. In the type  
881 section reporter ion MS3 and TMT 10plex was selected and reporter mass tolerance set to 0.01 Da.  
882 Lysine 8 and Arginine 10 were defined in Andromeda as variable modifications and subsequently  
883 selected as such in the MaxQuant modifications section next to Oxidation and N-terminal acetylation.  
884 Peptide mass tolerance in the instrument section was set to 5 ppm. In the identification section the  
885 minimum score for modified peptides and the minimum delta score for modified peptides were set to 0.  
886 In the MS/MS – ITMS section the MS/MS – ITMS match tolerance was set to 0.4 Da and water loss was  
887 deselected. All other settings were used at their default value.

888

### 889 **Processing and Analysis of TMT-SILAC Data**

890 Data was processed according to Zecha et al. with additional peptide sum normalization. Therefore,  
891 data was retrieved from the 'evidence' table provided by MaxQuant. PSMs in the evidence table were  
892 filtered to remove 'Potential contaminants' and 'Reverse' matches to the decoy database. Because of  
893 their uncertain TMT labelling status PSMs of acetylated N-terminal peptides ('Acetyl' in the 'Modification'  
894 column) were removed as well. For all following steps corrected reporter ion intensities were used  
895 ('Reporter intensity corrected').

896

897 Any PSM in the cleaned-up evidence table containing a lysine 8 or arginine 10 modification was  
898 assigned to the SILAC heavy dataset, whereas any PSM that did not carry any such modification was  
899 assigned to the SILAC light dataset. PSMs were collapsed into peptides by summing up the reporter ion  
900 intensities for each TMT channel from all PSMs of a peptide. The two resulting tables contained for each  
901 peptide ten reporter ion intensities, which quantified synthesis or degradation (depending on SILAC  
902 heavy or light). Additionally, each peptide was annotated with the uniprot identifier ('Leading razor  
903 protein') so that peptides from the same host protein could be merged later on.

904 Peptide sum normalization (PSN) can only be applied when TMT peptide intensities for both SILAC  
905 channels are available. The two distinct tables of SILAC light and heavy TMT peptide intensities were  
906 therefore merged by peptides, discarding peptides only quantified in one SILAC channel.  
907 Absolute MS3 reporter intensities depend on the MS1 signal, i.e. the combined SILAC intensity of all  
908 time points, which can differ greatly between SILAC channels. Because they are derived from cells  
909 carrying only one SILAC label TMT peptide intensities should be identical between time point 0 of the  
910 degradation SILAC channel, and time point infinity of the synthesis SILAC channel. This can be used to  
911 adjust TMT peptide intensities from either channel to the same baseline intensity. For each peptide in  
912 each SILAC channel all TMT reporter intensities were multiplied by a common factor to align time points  
913 0 and infinity:

$$914 C_{\text{degradation}} = (I_{\text{degradation}}(0) + I_{\text{synthesis}}(\text{inf})) / (2 * I_{\text{degradation}}(0))$$

$$915 C_{\text{synthesis}} = (I_{\text{degradation}}(0) + I_{\text{synthesis}}(\text{inf})) / (2 * I_{\text{synthesis}}(\text{inf}))$$

916 Where  $C_{\text{degradation}}$  is the correction factor for one peptide in the SILAC channel dedicated to degradation,  
917  $C_{\text{synthesis}}$  in the SILAC channel dedicated to synthesis.  
918 Next, Total Sum Normalization (TSN) was applied with the aim to equalize the sum of TMT peptide  
919 intensities across all TMT channels. Therefore, TMT peptide intensities from both SILAC channels were  
920 summed up to calculate one correction factor for each TMT channel:

$$921 C_{\text{TMT}_X} = \text{median}(\text{sum}(I_{\text{TMT}_1\text{-degradation}} + I_{\text{TMT}_1\text{-synthesis}}), \text{sum}(I_{\text{TMT}_2\text{-degradation}} + I_{\text{TMT}_2\text{-synthesis}}), \dots$$
$$922 \text{sum}(I_{\text{TMT}_{10}\text{-synthesis}} + I_{\text{TMT}_{10}\text{-degradation}})) / (\text{sum}(I_{\text{TMT}_X\text{-degradation}} + I_{\text{TMT}_X\text{-synthesis}}))$$

923 Where  $C_{\text{TMT}_X}$  is the correction factor for all peptides in the TMT channel X. TMT peptide intensities from  
924 each SILAC channel could now be corrected with the same correction factor for each TMT channel, so  
925 that their combined sum was identical between time points. Considering all protein in a TMT channel –  
926 disregarding their identity – this fulfills the prerequisite that protein amounts stay constant over all time  
927 points.

928  
929 Peptide Sum Normalization (PSN) transforms the TMT intensities of each peptide, so that the combined  
930 peptide intensity from both SILAC channels is the same across TMT channels. It thereby extends the  
931 prerequisite that protein amounts stay constant over time to the peptide level. Therefore, for each  
932 peptide a set of correction factors needs to be calculated, which normalize the intensity of every channel  
933 towards one reference channel. Which channel is designated as the reference channel is in principle  
934 arbitrary. However, we chose the 32 hour time point for this purpose because the combined SILAC light  
935 intensities were very similar to the combined SILAC heavy intensities at this time point. For each peptide  
936 the PSN correction factor can then be calculated according to:

$$937 C_{\text{TMT}_X} = \text{sum}(I_{\text{TMT}_32\text{h-degradation}} + I_{\text{TMT}_32\text{h-synthesis}}) / \text{sum}(I_{\text{TMT}_X\text{-degradation}} + I_{\text{TMT}_X\text{-synthesis}})$$

938  $C_{\text{TMT}_X}$  is the correction factor for one peptide in the TMT channel X and TMT\_32h denotes to the TMT  
939 channel that carries the 32 hour time point. The resulting table contained for each peptide ten correction  
940 factors, which in the case of the 32 hour timepoint was always '1' (because all values had been  
941 normalized towards this time point). TMT peptide intensities from each SILAC channel could now be  
942 corrected with one set of correction factors per peptide, so that the combined sum of their TMT peptide  
943 intensities was identical between time points.

944 For better comparison we implemented PSN on top of TSN. Note that for the control data ('TSN') we  
945 present in Fig. S1 as well as Fig. S5 PSN correction factors were simply substituted by the entries '1'.  
946 Thereby, the control data could be treated identically to the PSN-corrected data in all of the following  
947 steps of the analysis.

948  
949 In order to combine peptide synthesis curves into protein synthesis curves all TMT peptide intensities  
950 were normalized to time point infinity. Subsequently, the background at timepoint 0 was subtracted from  
951 all other timepoints. *Vice versa*, in order to combine peptide decay curves into protein decay curves all  
952 TMT peptide intensities were normalized to time point 0. Subsequently, the background at timepoint  
953 infinity was subtracted from all other timepoints. Peptides with resulting ratios smaller 0 or larger 1 at  
954 any time point other than 0 or infinity, respectively, were discarded. Normalized peptide ratios were



955 collapsed into protein ratios in order to fit degradation or synthesis functions to them. For each timepoint  
956 the normalized peptide ratios from all peptides of a protein ('Leading razor protein') were collapsed into  
957 one ratio using their median. The resulting table contained the uniprot identifier of a protein and 8 (in  
958 the case of the total proteome) or 10 (in the case of the polysome profiling data) normalized protein  
959 ratios. In the synthesis case, entries for timepoint 0 were always 0 and entries for timepoint infinity  
960 always 1. In the degradation case, entries for timepoint 0 were always 1 and entries for timepoint infinity  
961 always 0. All PSN-normalized protein decay curves are reported in Table S2.

962

963 For curve fitting we used the model introduced by Boisvert et al.<sup>44</sup> for pulsed-SILAC data, which was  
964 later adapted by Welle et al.<sup>23</sup> and Zecha et al.<sup>24</sup> for TMT-SILAC. For curve fitting we used the library  
965 minpack.lm (Elzhov et al., <https://CRAN.R-project.org/package=minpack.lm>), which overcomes the  
966 zero-residual problem of exceptionally well-fitting data. Synthesis was modelled using the function:  $y \sim$   
967  $(B_{syn} - A_{syn}) * \exp(-K_{syn} * x) + A_{syn}$ , with the starting values  $A_{syn} = 1$ ,  $B_{syn} = 0.3$ ,  $K_{syn} = 0.01$ , the lower  
968 modelling constraints  $A_{syn} = 0$ ,  $B_{syn} = -2$ ,  $K_{syn} = -1$  and the upper modelling constraints  $A_{syn} = 3$ ,  $B_{syn} =$   
969  $2$ ,  $K_{syn} = 5$ . Degradation was modelled using the function:  $y \sim (A_{deg} - B_{deg}) * \exp(-K_{deg} * x) + B_{deg}$  with  
970 the starting values  $A_{deg} = 1$ ,  $B_{deg} = 0.3$ ,  $K_{deg} = 0.01$ , the lower modelling constraints  $A_{deg} = 0$ ,  $B_{deg} =$   
971  $-2$ ,  $K_{deg} = -1$  and the upper modelling constraints  $A_{deg} = 3$ ,  $B_{deg} = 2$ ,  $K_{deg} = 5$ . Pseudo  $R^2$  for the fitted  
972 functions was assessed with the library rcompanion (Mangiafico et al., [https://CRAN.R-](https://CRAN.R-project.org/package=rcompanion)  
973 [project.org/package=rcompanion](https://CRAN.R-project.org/package=rcompanion)), using the Nagelkerke method for comparing a non-linear model  
974 towards a null model. The null model was created by fitting a null function with the minpack.lm library  
975 for the same time points as for the actual experiment:  $y \sim \text{function}(x, m)\{m\}$  with the starting value  $m = 1$ .  
976 Fitting results were discarded if the fitting parameters did not meet the constraints  $0.5 \leq A \leq 2$ ,  $-1 \leq B \leq$   
977  $1$ ,  $K > 0$  and  $R^2 \geq 0.8$  for either synthesis or degradation. Synthesis and degradation half-lives were  
978 calculated from the parameter  $K$  using the formula:  $HL = \log(2) / K$ .

979

### 980 **Benchmarking Peptide Sum Normalization (PSN)**

981 We benchmarked PSN using a published TMT-SILAC dataset from HeLa cells<sup>24</sup>, and applied our fitting  
982 pipeline to the reported curves (supplementary table 'Evidence\_fit parameter'). Although the reported  
983 TMT PSM intensities were preprocessed we reprocessed them using our TSN and PSN pipeline. As  
984 mentioned above, this included MS3 intensity correction, total sum correction and finally peptide sum  
985 correction. For both TSN and PSN all steps were performed, yet, for TSN all peptide sum correction  
986 factors were substituted by '1'. Again, PSN visibly improved data continuity between time points in  
987 comparison to TSN, led to a larger number of protein half-lives for which both synthesis and decay half-  
988 lives could be determined (Figure S5B&C). Moreover, PSN improved reproducibility between the  
989 quadruplicates from an average Pearson  $R^2$  of 0.68 under TSN to 0.86 under PSN (Figure S5C). As  
990 mentioned in the main text, the TSN-corrected protein half-lives were similar to PSN-corrected half-lives  
991 for both synthesis and degradation, while PSN-corrected protein synthesis and decay half-lives were  
992 virtually identical (Figure S1G). We computed the relative differences between half-lives under PSN or  
993 TSN (Figure S5D) and found them in median identical for synthesis (0.99 fold) and slightly longer for  
994 decay (1.11 fold). These combined metrics confirmed the robust performance of PSN and showed that  
995 a minor distortion of half-lives occurred for some proteins in comparison to earlier approaches.  
996 In addition, we used our own protein half-life data for the MCF7 total proteome to show the effect of PSN  
997 for the individual time points in the TMT-SILAC experiment. Therefore, we deliberately applied the wrong  
998 PSN correction factors to one of the time points in our analysis. Figure S5E compares the synthesis and  
999 decay half-lives resulting from each of these analyses, demonstrating that especially erroneous  
1000 correction of later time points had a stronger effect.

1001

### 1002 **Processing and Analysis of all other Proteomic Data**

1003 For the analysis of proteomic data other than TMT-SILAC data, the MaxQuant proteinGroups.txt table  
1004 was used. Tables were filtered to remove 'Potential contaminants', 'Reverse' matches to the decoy  
1005 database, as well as proteins 'Only identified by site'. In all analysis, except the quantification of



1006 ribophagy upon translation inhibition, normalized protein ratios were used for SILAC quantification. For  
1007 the quantification of ribophagy upon translation inhibition unnormalized protein ratios were used, which  
1008 were further corrected using the four untreated replicates. Therefore, the mean of the heavy/light ratio  
1009 for each protein from the untreated quadruplicates was calculated as set of correction factors.  
1010 Heavy/light ratios of all proteins from the treated quadruplicates were divided by these factors  
1011 individually. The average of the resulting ratios was derived and proteins filtered for a variance smaller  
1012 20 % between replicates.

1013 For dose-response analysis of arsenite treatment on MCF7 or HeLa cells, respectively, the R package  
1014 'drc'<sup>62</sup> was applied.

1015

### 1016 **Functional Annotation of Proteins**

1017 For all cross-references with protein databases uniprot identifier were used. Proteins were identified as  
1018 members of the cytosolic ribosome (thereby excluding mitochondrial ribosomal proteins) using the GO  
1019 terms 'cytosolic small ribosomal subunit' and 'cytosolic large ribosomal subunit' and as members of the  
1020 spliceosome using the GO term 'spliceosomal complex' in ENSEMBL BioMart (Ensembl release 96)  
1021 accessed via biomaRt<sup>63,64</sup>. Proteins were identified as members of particular complexes by intersection  
1022 with the CORUM complex collection.

1023

### 1024 **Cryo-EM sample preparation and data collection**

1025 MCF7 cells were treated in 15 cm dishes (confluency ~70%), by adding arsenite (Santa Cruz sc-301816)  
1026 directly to the cell medium to a final concentration of 400  $\mu$ M and incubating for 10 minutes at 37 °C, 5  
1027 % CO<sub>2</sub>. Lysis and polysome fractionation were performed as described above (1 dish of cells was used  
1028 for each sample and loaded on one gradient), except that all fractions corresponding to 40S, 60S and  
1029 80S ribosome complexes were collected and pooled. Ribosomes were next pelleted by  
1030 ultracentrifugation of the pooled fractions (which contained about 15% sucrose) for 1.5 hours at 55 000  
1031 rpm, 4 °C on a Sorvall WX90 ultracentrifuge (Beckman) with SW55Ti rotor. The supernatant was  
1032 discarded, pellets were soaked in polysome buffer (50 mM Tris pH 8, 10 mM MgCl<sub>2</sub>, 140 mM KCl) for  
1033 20 minutes on ice and resuspended by pipetting. Solutions were adjusted to OD<sub>600</sub>~10 and applied to  
1034 carbon-coated holey copper grids (Quantifoil R2/1). Grids were glow-discharged for 30 s in  
1035 oxygen/argon atmosphere of a plasma cleaner (Gatan Solarus 950) before deposition of a 4- $\mu$ l aliquot  
1036 of the sample. Excess buffer was blotted away for 1 s and grids were immediately vitrified in liquid  
1037 ethane (-182°C) using a FEI Vitrobot (Mark II). Samples were stored in liquid nitrogen until data  
1038 collection. One grid per sample was selected for data collection. Cryo-EM imaging was performed on a  
1039 FEI Titan Krios 300 keV electron microscope equipped with a K3 detector (Gatan), and operated in  
1040 counting mode. For the experiment with ribosomes from arsenite-naïve cells (hereinafter referred to as  
1041 'untreated ribosomes'), illumination conditions were adjusted to collect 6,564 movie stacks, each  
1042 containing 20 frames, at 1.07 Å per pixel. Illumination conditions for ribosomes from arsenite-treated  
1043 cells (hereinafter referred to as 'arsenite-treated ribosomes') were adjusted to collect 7,112 micrographs,  
1044 each containing 20 frames, at 1.07 Å per pixel. The defocus value ranged from -0.5 to 2.5  $\mu$ m and the  
1045 total electron dose was 27.56 e-/Å<sup>2</sup>. Collection of data was automated with the EPU software (Thermo  
1046 Fisher Scientific).

1047

### 1048 **Image processing**

1049 Unless stated otherwise, computational analysis of both datasets was performed using the Relion 3.1  
1050 software package<sup>65</sup>. Datasets were processed separately, but following the same scheme shown in  
1051 Fig. S3. The stacks of frames were aligned in MotionCor2 to correct for specimen motion during  
1052 exposure, with the number of patches set to 5 × 5<sup>66</sup>. The contrast transfer function (CTF) was  
1053 determined on the motion corrected sum of frames using Gctf<sup>67</sup>. To generate reference templates for  
1054 auto-picking, ~1,700 particle images of ribosomes were randomly picked from the micrographs and  
1055 subjected to a reference-free two-dimensional (2D) classification. No 40S subunit class average was  
1056 observed among resulting 2D classes. Only 2D class averages resembling either the large 60S subunit

1057 or the full 80S ribosome were thus used as references for picking particles from the whole datasets. For  
1058 validation of the auto-picking efficiency, picking of the particles was assessed manually. After this  
1059 efficiency control step, the dataset with untreated ribosomes contained 1,497,356 particle images,  
1060 whereas dataset with arsenite-treated ribosomes contained 1,760,231 particle images. The resulting  
1061 particle images were extracted at pixel size of 4.28 Å in boxes of 128 × 128 pixels.  
1062 To separate either dataset into homogenous populations, a hierarchical three-dimensional (3D)  
1063 classification scheme was carried out. The initial tier of particle sorting was performed to classify the  
1064 particles on the basis of global compositional heterogeneity (e.g. false positives vs. ribosomal species  
1065 or full 80S ribosomes vs. 60S ribosomal subunits), before sorting based on large-scale conformational  
1066 (e.g. intersubunit rotation and 40S subunit ratcheting) and subtler compositional differences (e.g.  
1067 presence of ribosome inactivation factor).

1068  
1069 For initial classification of arsenite-treated ribosomes, a human 80S ribosome (EMD-3883)<sup>68</sup> low-pass  
1070 filtered to 40 Å resolution was used as a reference. One of the resulting 3D class averages (47,401  
1071 particles) showed high-resolution structural features of the 80S ribosome and was subjected to 3D auto-  
1072 refinement. The refinement yielded a consensus 80S map with subnanometer global resolution, which  
1073 served as internal reference for repeated initial particle sorting in either dataset. This allowed us to  
1074 separate 80S ribosomes and 60S ribosomal subunits in homogenous particle groups. Only 3D class  
1075 averages depicting high-resolution ribosomal features were retained for further processing, while  
1076 classes containing false positives and suboptimal particles were excluded.

1077  
1078 Well-defined features of 80S ribosomes were observed in 84,841 particles in the untreated dataset.  
1079 Similarly, we identified 235,820 particles to recapitulate high-resolution features of clean 80S ribosomes  
1080 in arsenite-treated dataset. All selected particles were subjected to an initial round of 3D auto-refinement  
1081 using an 80S mask and 60S reference low-pass filtered to 60 Å. For this purpose, we generated a binary  
1082 80S mask using one of the best resolved 80S class averages. To generate a 60S reference, we  
1083 manually segmented one of the resultant 80S class averages into 60S and 40S ribosomal subunits, and  
1084 resampled the resulting 60S segment on original 80S map in UCSF Chimera<sup>69</sup>. A 3D reconstruction of  
1085 all untreated 80S ribosomes thus was calculated to 8.56 Å after post-processing, while the 80S  
1086 reconstruction from all arsenite-treated 80S ribosomes was determined to a resolution of 8.56 Å.  
1087 Following 3D auto-refinement, a single round of focused 3D classification with 40S mask and without  
1088 alignment was performed. To that end, binary 40S mask was generated following the same protocol as  
1089 described for 60S mask creation. This strategy was very effective at further separating clean 80S  
1090 ribosomes. In total, 56,228 80S particles from untreated dataset and 53,821 80S particles from arsenite-  
1091 treated dataset were retained after 3D classification. The sorted particles were re-centered, extracted  
1092 at pixel size of 1.52 Å in boxes of 360 × 360 pixels and subjected to another round of 3D auto-refinement  
1093 using solvent-flattened Fourier shell correlation (FSC) and otherwise standard parameters. This  
1094 revealed the 80S ribosomes at 4.05 Å global resolution in untreated dataset and at 4.38 Å global  
1095 resolution in arsenite-treated dataset after post-processing. Following 3D auto-refinement, particles  
1096 were subjected to per-particle CTF refinement (including beam tilt estimation for individual datasets)  
1097 and migrated to Relion 3.0\_beta for all subsequent processing steps. The overall resolution was  
1098 improved to 3.28 Å and 3.6 Å with post-processing in untreated and arsenite-treated 80S ribosomes,  
1099 respectively, after Bayesian particle polishing<sup>70</sup>.

1100  
1101 To isolate homogenous particle groups within the set of 80S assemblies, we used one round of focused  
1102 classification centered on the 40S subunit. The sorted particles were inspected manually and suboptimal  
1103 ribosomes with a low level of interpretability were discarded. The individual classes were refined as  
1104 before. To assign the best-resolved reconstructions to a particular ratcheting and rotational state of the  
1105 40S ribosomal subunit, we aligned the resultant 80S reconstructions with previously published rotated  
1106 and non-rotated ribosomal structures<sup>29</sup>. On the basis of particle number and map quality, in particular  
1107 the 40S region, we identified two distinct states among untreated and arsenite-treated ribosomes, with

1108 the post-translocation (POST)-like state being the most abundant one in both datasets. The POST class  
1109 in the untreated dataset contained 21,463 particles (38.16 %, percentage of particles from the full 80S  
1110 dataset) and refined to an overall resolution of 3.77 Å after post-processing, whereas the POST class  
1111 in arsenite-treated dataset was defined with 48,725 particles (90.55 %) that could be refined to an  
1112 estimated resolution of 3.58 Å after post-processing. Although the 3D auto-refinement yielded cryo-EM  
1113 maps at high global resolution, the small subunit density still appeared more fragmented as compared  
1114 to the large subunit, suggesting further heterogeneity in this region. In order to compensate for observed  
1115 local flexibility originating from intersubunit rotation and 40S subunit movement, a 3D multibody  
1116 refinement was performed as described previously<sup>71,72</sup>. In short, we split the 80S density into two  
1117 independent segments, comprising the 40S subunit and the 60S subunit. This strategy resulted in 40S  
1118 density segments at 3.72 Å (untreated ribosomes) and 3.65 Å (arsenite-treated ribosomes) global  
1119 resolution after post-processing using the 40S mask also employed for 3D multibody refinement.  
1120 Similarly, the results yielded 60S density segments at 3.09 Å (untreated ribosomes) and 3.28 Å  
1121 (arsenite-treated ribosomes) after post-processing with the 60S mask also used for 3D multibody  
1122 refinement.

1123

1124 To calculate compositional and conformational differences between the POST-like 80S ribosome in  
1125 either dataset and a reference human ribosome in POST state (EMD-10674), we applied the difference  
1126 map approach using TEMPy<sup>73</sup>. The maps were first low-pass filtered to 6 Å. The difference between  
1127 maps was calculated after map-to-map fitting and based on global scaling. The locations and a shape  
1128 of the beak region within the 40S subunit and the P-stalk area within the 60S subunit were identified as  
1129 the difference peaks in both datasets (Fig. 2K and Fig. S6K).

1130

1131 In parallel, 80S assemblies were subjected to independent rounds of focused 3D classification with a  
1132 mask focusing on factors that were visible at low threshold levels already in the consensus refinement  
1133 structure, i.e. either LYAR or IFRD2, to enrich for their occupancy. This enabled us to identify one LYAR-  
1134 enriched class with 7,314 particles in the untreated dataset and one LYAR-containing class with 8,242  
1135 particles from the arsenite-treated dataset. Each resultant class was refined using the 3D auto-  
1136 refinement procedure against the respective particles within that class with a soft reference mask in the  
1137 shape of the 80S ribosome, thus yielding reconstructions at 5.64 Å and 6.08 Å global resolution after  
1138 post-processing in the untreated and arsenite-treated dataset, respectively. Similarly, a total of 9,487  
1139 80S untreated 80S ribosomes and 6,985 arsenite-treated 80S ribosomes were found to depict the  
1140 strongest density of IFRD2, and were determined to a resolution of 4.34 Å (untreated IFRD2-80S  
1141 complex) and 5.82 Å (arsenite-treated IFRD2-80S complex) after post-processing.

1142

1143 Finally, for processing of the 60S subunits, we used a similar protocol as described above. All processing  
1144 steps preceding Bayesian particle polishing were performed in Relion 3.1. Briefly, after initial 3D  
1145 classification, well-defined features of 60S subunits were observed in 43,436 particles among untreated  
1146 ribosomal assemblies. In parallel, we identified 324,519 particles to show high-resolution features of  
1147 clean 60S subunits among the arsenite-treated ribosomal assemblies. In an attempt to improve  
1148 resolution of the 60S subunit, we extracted pre-selected 60S particles at full spatial resolution (1.07 Å,  
1149 box size 384 × 384 pixels) and subjected them to 3D auto-refinement. After 3D auto-refinement, particles  
1150 were subjected to CTF refinement transferred to Relion 3.0\_beta for Bayesian particle polishing using  
1151 a training set of 5,000 particles. The resulting 'shiny' particles were subjected to a final round of 3D auto-  
1152 refinement. For post-processing, a solvent mask was generated from the final map from 3D auto-  
1153 refinement, low-pass filtered to 15 Å. The initial binary mask was extended by 5 Å in all directions and  
1154 a raised-cosine edge was added to create a soft mask. A final refinement of 60S particles resulted in  
1155 post-processed 3.14 Å (untreated 60S) and 2.85 Å (arsenite-treated 60S) cryo-EM maps.  
1156 Additionally, focused 3D classification was performed on the eIF6 binding area of the 60S ribosomal  
1157 subunits to enrich for its occupancy. Starting with 43,436 untreated particles, multiple rounds of focused  
1158 3D classification were used to isolate two classes of 13,004 particles in which the eIF6 density was best

1159 resolved. The two classes were pooled and refined together to 3.84 Å after post-processing, with a mask  
1160 encompassing the full eIF6-60S complex.

1161

1162 The global resolution and the temperature factors of the maps were estimated by applying a soft mask  
1163 around the ribosome density and using the “gold standard” FSC criterion of independently refined half  
1164 maps (FSC = 0.143) within Relion.

1165

#### 1166 **Gene-Ontology (GO) Enrichment Analysis**

1167 Ranked GO enrichment analysis was performed using the GOrilla <sup>74</sup> web interface and uniprot identifier  
1168 as input.

1169

#### 1170 **Statistical Analysis and Data Visualization**

1171 Data was filtered by variance cut-offs, which were individually selected for each experiment with the  
1172 objective to include as many data points as possible, while excluding outliers or highly variable data that  
1173 would undermine statistical power. All data handling apart from what is mentioned above was performed  
1174 in R (3.5.3) with RStudio (1.1.463) and visualized using the ggplot2 <sup>75</sup> library. Figures were arranged  
1175 in Illustrator (CC, Adobe 2015).

1176
